# Supplementary material for: Occurrences of allergenicity to banana pathogenesis-related-10 (PR10) protein variants
Source: Royal Society of Chemistry journal article supplement (doi:10.1039/d4fo03301a), 2024-01-01

Supplementary Information (SI) for Food & Function.  
This journal is © The Royal Society of Chemistry 2024

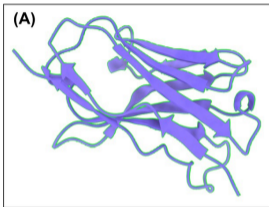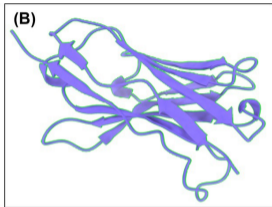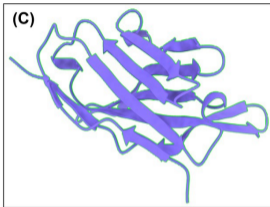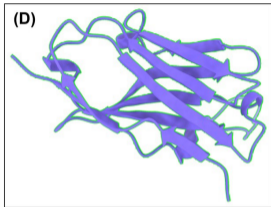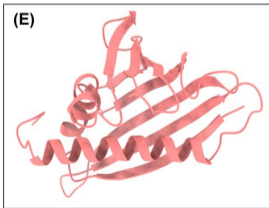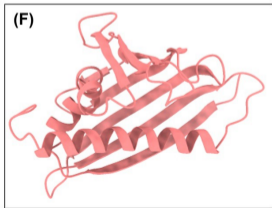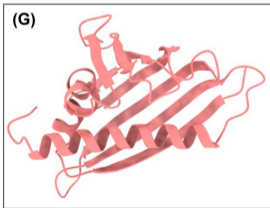

Supplement: d4fo03301a2.pdf [file d4fo03301a2.pdf]
