# Supplementary material for: Occurrences of allergenicity to banana pathogenesis-related-10 (PR10) protein variants
Source: Royal Society of Chemistry journal article supplement (doi:10.1039/d4fo03301a), 2024-01-01
Supplement: d4fo03301a4.xlsx [file d4fo03301a4.xlsx]

## Sheet: Table S1
Table S1. Top hits for allergenicity potential of (A) Bet v 1, (B) MaPR10-BeB5, and (C) MaPR10-GNA5 using AllergenOnline.
(A) Bet v 1
Hit	Defline	Species	Best	# Hits	Full Alignment			Links
#			%ID	> 35%	E-val	%ID	length	NCBI	Details
1	gi|4006963|gid|21|pollen allergen Betv1, isoform at87 [Be	Betula pendula	1	81of81	6.4e-45	0.992	119	gi|4006963	GO!
2	gi|1321720|gid|21|major allergen Bet v 1 [Betula pendula]	Betula pendula	1	81of81	3e-61	0.994	160	gi|1321720	GO!
3	gi|4590392|gid|21|isoallergen bet v 1 b1 [Betula pendula]	Betula pendula	1	81of81	2e-60	0.969	160	gi|4590392	GO!
4	gi|565807648|gid|21|Chain A, Crystal Structure Of A Unusu	Betula pendula	1	81of81	8.8e-60	0.988	160	gi|565807648	GO!
5	gi|4006945|gid|21|pollen allergen Betv1, isoform at10 [Be	Betula pendula	1	81of81	2e-60	0.981	160	gi|4006945	GO!
6	gi|38492423|gid|21|Chain A, Birch Pollen Allergen Bet V 1	Betula pendula	1	81of81	3.1e-60	0.987	159	gi|38492423	GO!
7	gi|1542873|gid|21|pollen allergen Bet v 1 [Betula pendula	Betula pendula	1	81of81	7.2e-61	0.994	160	gi|1542873	GO!
8	gi|560188694|gid|21|Chain A, Crystal Structure Of An Unus	Betula pendula	1	81of81	1.5e-60	0.994	159	gi|560188694	GO!
9	gi|1542863|gid|21|pollen allergen Bet v 1 [Betula pendula	Betula pendula	1	81of81	1.7e-61	0.994	160	gi|1542863	GO!
10	gi|1542861|gid|21|pollen allergen Bet v 1 [Betula pendula	Betula pendula	1	81of81	1.1e-60	0.975	160	gi|1542861	GO!
11	gi|159162097|gid|21|Chain A, Birch Pollen Allergen Bet V	Betula pendula	1	81of81	7.2e-61	0.994	159	gi|159162097	GO!
12	gi|1542865|gid|21|pollen allergen Bet v 1 [Betula pendula	Betula pendula	1	81of81	2.3e-60	0.975	160	gi|1542865	GO!
13	gi|2564222|gid|21|pollen allergen Betv1 [Betula pendula]	Betula pendula	1	81of81	2.2e-61	0.994	160	gi|2564222	GO!
14	gi|1542869|gid|21|pollen allergen Bet v 1 [Betula pendula	Betula pendula	1	81of81	4e-61	0.994	160	gi|1542869	GO!
15	gi|560188693|gid|21|Chain A, Crystal Structure Of A Varia	Betula pendula	1	81of81	7.2e-61	0.994	159	gi|560188693	GO!
16	gi|17938|gid|21|Bet v 1 - like [Betula pendula]	Betula pendula	1	81of81	1.4e-61	1	160	gi|17938	GO!
17	gi|4006955|gid|21|pollen allergen Betv1, isoform at42 [Be	Betula pendula	1	81of81	2.5e-59	0.956	160	gi|4006955	GO!
18	gi|560188692|gid|21|Chain B, Crystal Structure Of A Dimer	Betula pendula	1	81of81	2e-60	0.994	159	gi|560188692	GO!
19	gi|2564224|gid|21|pollen allergen Betv1 [Betula pendula]	Betula pendula	1	81of81	5.4e-61	0.994	160	gi|2564224	GO!
20	gi|4006947|gid|21|pollen allergen Betv1, isoform at14 [Be	Betula pendula	1	81of81	4.1e-45	1	119	gi|4006947	GO!
21	gi|4006953|gid|21|pollen allergen Betv1, isoform at37 [Be	Betula pendula	1	81of81	9.7e-61	0.981	160	gi|4006953	GO!
22	gi|4590394|gid|21|isoallergen Bet v 1 b2 [Betula pendula]	Betula pendula	1	81of81	1.3e-60	0.988	160	gi|4590394	GO!
23	gi|4006928|gid|21|pollen allergen Betv1, isoform at8 [Bet	Betula pendula	1	81of81	2.3e-60	0.969	160	gi|4006928	GO!
24	gi|12583685|gid|21|Bet vI jap3 [Betula platyphylla]	Betula platyphylla	0.988	81of81	4.2e-60	0.963	160	gi|12583685	GO!
25	gi|12583683|gid|21|Bet vI jap2 [Betula platyphylla]	Betula platyphylla	0.988	81of81	8.8e-60	0.963	160	gi|12583683	GO!
26	gi|452736|gid|21|Bet v 1 f [Betula pendula]	Betula pendula	0.988	81of81	1e-59	0.956	160	gi|452736	GO!
27	gi|661918055|gid|21|Chain A, Crystal Structure Of Peroxin	Betula pendula	0.988	81of81	8e-59	0.975	159	gi|661918055	GO!
28	gi|4006957|gid|21|pollen allergen Betv1, isoform at45 [Be	Betula pendula	0.988	81of81	9.7e-61	0.981	160	gi|4006957	GO!
29	gi|4006959|gid|21|pollen allergen Betv1, isoform at50 [Be	Betula pendula	0.988	81of81	6.2e-61	0.981	160	gi|4006959	GO!
30	gi|1542871|gid|21|pollen allergen Bet v 1 [Betula pendula	Betula pendula	0.988	81of81	8.4e-61	0.988	160	gi|1542871	GO!
31	gi|550544347|gid|21|Chain A, Crystal Structure Of The Maj	Betula pendula	0.988	81of81	8e-59	0.975	159	gi|550544347	GO!
32	gi|452740|gid|21|Bet v 1 j [Betula pendula]	Betula pendula	0.988	81of81	4.2e-60	0.963	160	gi|452740	GO!
33	gi|11514622|gid|21|Chain A, Birch Pollen Allergen Bet V 1	Betula pendula	0.988	81of81	9.3e-59	0.969	159	gi|11514622	GO!
34	gi|4006965|gid|21|pollen allergen Betv1, isoform at5 [Bet	Betula pendula	0.988	81of81	3e-58	0.944	160	gi|4006965	GO!
35	gi|955264732|gid|21|Chain D, Crystal Structure Of Birch P	Betula pendula	0.975	81of81	4.1e-58	0.975	159	gi|955264732	GO!
36	gi|2414158|gid|21|major allergen Bet v 1 [Betula pendula]	Betula pendula	0.975	81of81	3.7e-60	0.963	160	gi|2414158	GO!
37	gi|2564228|gid|21|pollen allergen Betv1 [Betula pendula]	Betula pendula	0.975	81of81	3.2e-60	0.969	160	gi|2564228	GO!
38	gi|452732|gid|21|Bet v 1 d [Betula pendula]	Betula pendula	0.975	81of81	1.8e-59	0.956	160	gi|452732	GO!
39	gi|1321728|gid|21|major allergen Bet v 1 [Betula pendula]	Betula pendula	0.975	81of81	2.1e-59	0.969	160	gi|1321728	GO!
40	gi|2564220|gid|21|pollen allergen Betv1 [Betula pendula]	Betula pendula	0.975	81of81	7.6e-60	0.963	160	gi|2564220	GO!
41	gi|83722364|gid|21|major allergen Bet v 1.01E [Betula pen	Betula pendula	0.975	81of81	6.7e-56	0.967	150	gi|83722364	GO!
42	gi|1168706|gid|21|Major pollen allergen Bet v 1-G (Bet v	Betula pendula	0.975	81of81	2.5e-59	0.95	160	gi|1168706	GO!
43	gi|4376222|gid|21|pollen allergen, Betv1 [Betula pendula]	Betula pendula	0.975	81of81	6.3e-58	0.943	159	gi|4376222	GO!
44	gi|12583681|gid|21|Bet vI jap1 [Betula platyphylla]	Betula platyphylla	0.975	81of81	8.1e-59	0.944	160	gi|12583681	GO!
45	gi|1542867|gid|21|pollen allergen Bet v 1 [Betula pendula	Betula pendula	0.975	81of81	1e-59	0.969	160	gi|1542867	GO!
46	gi|452744|gid|21|Bet v 1 l [Betula pendula]	Betula pendula	0.975	81of81	6e-59	0.944	160	gi|452744	GO!
47	gi|4376216|gid|21|pollen allergen, Betv1 [Betula pendula]	Betula pendula	0.975	81of81	1.2e-58	0.95	159	gi|4376216	GO!
48	gi|452734|gid|21|Bet v 1 e [Betula pendula]	Betula pendula	0.963	81of81	5.2e-59	0.95	160	gi|452734	GO!
49	gi|4376220|gid|21|pollen allergen, Betv1 [Betula pendula]	Betula pendula	0.963	81of81	2.9e-59	0.962	159	gi|4376220	GO!
50	gi|1321716|gid|21|major allergen Bet v 1 [Betula pendula]	Betula pendula	0.963	81of81	1.6e-59	0.956	160	gi|1321716	GO!
51	gi|4006967|gid|21|pollen allergen Betv1, isoform at7 [Bet	Betula pendula	0.963	81of81	7e-59	0.95	160	gi|4006967	GO!
52	gi|4590396|gid|21|isoallergen bet v 1 b3 [Betula pendula]	Betula pendula	0.963	81of81	2.9e-59	0.95	160	gi|4590396	GO!
53	gi|1321722|gid|21|major allergen Bet v 1 [Betula pendula]	Betula pendula	0.938	81of81	4.2e-55	0.9	160	gi|1321722	GO!
54	gi|1321718|gid|21|major allergen Bet v 1 [Betula pendula]	Betula pendula	0.938	81of81	1.6e-54	0.887	160	gi|1321718	GO!
55	gi|1321724|gid|21|major allergen Bet v 1 [Betula pendula]	Betula pendula	0.938	81of81	3.1e-55	0.9	160	gi|1321724	GO!
56	gi|1321726|gid|21|major allergen Bet v 1 [Betula pendula]	Betula pendula	0.925	81of81	4.3e-52	0.844	160	gi|1321726	GO!
57	gi|4376219|gid|21|pollen allergen, Betv1 [Betula pendula]	Betula pendula	0.925	81of81	1.8e-54	0.887	159	gi|4376219	GO!
58	gi|4376221|gid|21|pollen allergen, Betv1 [Betula pendula]	Betula pendula	0.925	81of81	1e-54	0.893	159	gi|4376221	GO!
59	gi|1168710|gid|21|Major pollen allergen Bet v 1-M/N (Bet	Betula pendula	0.925	81of81	4.8e-55	0.894	160	gi|1168710	GO!
60	gi|450885|gid|21|Bet v 1b [Betula pendula]	Betula pendula	0.912	81of81	2.1e-54	0.887	160	gi|450885	GO!
61	gi|4006961|gid|21|pollen allergen Betv1, isoform at59 [Be	Betula pendula	0.912	81of81	7.1e-56	0.906	160	gi|4006961	GO!
62	gi|452730|gid|21|Bet v 1 c [Betula pendula]	Betula pendula	0.9	81of81	1.2e-53	0.875	160	gi|452730	GO!
63	gi|83722317|gid|21|major allergen Bet v 1.02C [Betula pen	Betula pendula	0.9	81of81	2.5e-50	0.88	150	gi|83722317	GO!
64	gi|452742|gid|21|Bet v 1 k [Betula pendula]	Betula pendula	0.9	81of81	3.3e-54	0.881	160	gi|452742	GO!
65	gi|534910|gid|21|1-Sc1 [Betula pendula]	Betula pendula	0.887	81of81	9.7e-53	0.85	160	gi|534910	GO!
66	gi|534900|gid|21|1 Sc2 [Betula pendula]	Betula pendula	0.887	81of81	5.7e-52	0.849	159	gi|534900	GO!
67	gi|1321731|gid|20|major allergen Cor a 1 [Corylus avellan	Corylus avellana	0.875	81of81	3.7e-52	0.831	160	gi|1321731	GO!
68	gi|1321714|gid|21|major allergen Bet v 1 [Betula pendula]	Betula pendula	0.875	81of81	2.5e-51	0.819	160	gi|1321714	GO!
69	gi|1545897|gid|410|pollen allergen Car b 1 [Carpinus betu	Carpinus betulus	0.863	81of81	2.8e-49	0.787	160	gi|1545897	GO!
70	gi|261407|gid|34|Aln g I [Alnus glutinosa]	Alnus glutinosa	0.863	81of81	6e-51	0.813	160	gi|261407	GO!
71	gi|1545895|gid|410|pollen allergen Car b 1 [Carpinus betu	Carpinus betulus	0.838	81of81	1.1e-47	0.769	160	gi|1545895	GO!
72	gi|402747|gid|410|Car b I, partial [Carpinus betulus]	Carpinus betulus	0.825	81of81	8.7e-47	0.755	159	gi|402747	GO!
73	gi|1008580|gid|410|group 2 Car b 1=isoallergenic variant	Carpinus betulus	0.813	46of81	2.4e-24	0.813	80	gi|1008580	GO!
74	gi|534898|gid|21|1 Sc-3 [Betula pendula]	Betula pendula	0.813	81of81	3e-45	0.725	160	gi|534898	GO!
75	gi|22684|gid|20|major allergen [Corylus avellana]	Corylus avellana	0.8	81of81	6e-46	0.731	160	gi|22684	GO!
76	gi|167472841|gid|410|pollen allergen Car b 1 isoform [Car	Carpinus betulus	0.787	81of81	1.4e-46	0.744	160	gi|167472841	GO!
77	gi|167472839|gid|410|pollen allergen Car b 1 isoform [Car	Carpinus betulus	0.787	81of81	1.6e-46	0.738	160	gi|167472839	GO!
78	gi|1545875|gid|410|pollen allergen Car b 1 [Carpinus betu	Carpinus betulus	0.787	81of81	3.1e-47	0.75	160	gi|1545875	GO!
79	gi|1545877|gid|410|pollen allergen Car b 1 [Carpinus betu	Carpinus betulus	0.787	81of81	2.7e-47	0.75	160	gi|1545877	GO!
80	gi|402745|gid|410|Car b I [Carpinus betulus]	Carpinus betulus	0.787	81of81	1.9e-45	0.736	159	gi|402745	GO!
81	gi|167472845|gid|410|pollen allergen Car b 1 isoform [Car	Carpinus betulus	0.787	81of81	2.1e-46	0.738	160	gi|167472845	GO!
82	gi|22690|gid|20|major allergen [Corylus avellana]	Corylus avellana	0.787	81of81	8e-46	0.731	160	gi|22690	GO!
83	gi|167472837|gid|410|pollen allergen Car b 1 isoform [Car	Carpinus betulus	0.787	81of81	7.6e-47	0.75	160	gi|167472837	GO!
84	gi|167472843|gid|410|pollen allergen Car b 1 isoform [Car	Carpinus betulus	0.787	81of81	1.4e-46	0.744	160	gi|167472843	GO!
85	gi|300872535|gid|1632|pollen allergen [Ostrya carpinifoli	Ostrya carpinifolia	0.775	81of81	1.6e-46	0.744	160	gi|300872535	GO!
86	gi|402743|gid|410|Car b I, partial [Carpinus betulus]	Carpinus betulus	0.775	81of81	2.6e-45	0.73	159	gi|402743	GO!
87	gi|1545889|gid|410|pollen allergen Car b 1 [Carpinus betu	Carpinus betulus	0.775	81of81	4.7e-45	0.731	160	gi|1545889	GO!
88	gi|1545881|gid|410|pollen allergen Car b 1 [Carpinus betu	Carpinus betulus	0.775	81of81	8e-46	0.738	160	gi|1545881	GO!
89	gi|1545879|gid|410|pollen allergen Car b 1 [Carpinus betu	Carpinus betulus	0.775	81of81	1.8e-46	0.744	160	gi|1545879	GO!
90	gi|1008579|gid|410|group 1 Car b 1=isoallergenic variant	Carpinus betulus	0.762	44of81	3.1e-22	0.762	80	gi|1008579	GO!
91	gi|1545893|gid|410|pollen allergen Car b 1 [Carpinus betu	Carpinus betulus	0.762	81of81	2e-44	0.719	160	gi|1545893	GO!
92	gi|22686|gid|20|major allergen [Corylus avellana]	Corylus avellana	0.762	81of81	3.7e-44	0.713	160	gi|22686	GO!
93	gi|1321733|gid|20|major allergen Cor a 1 [Corylus avellan	Corylus avellana	0.75	81of81	3.4e-43	0.713	160	gi|1321733	GO!
94	gi|1008578|gid|410|group 1 Car b 1=isoallergenic variant	Carpinus betulus	0.75	44of81	4.8e-22	0.75	80	gi|1008578	GO!
95	gi|212291474|gid|1245|Fag s 1 pollen allergen [Fagus sylv	Fagus sylvatica	0.738	81of81	4e-40	0.662	160	gi|212291474	GO!
96	gi|1313968|gid|659|major allergen Mal d 1 [Malus x domest	Malus x domestica	0.738	81of81	5.4e-40	0.656	160	gi|1313968	GO!
97	gi|1991455313|gid|20|Chain A, Major allergen Cor a 1.0401	Corylus avellana	0.728	81of81	5.9e-41	0.673	159	gi|1991455313	GO!
98	gi|11762104|gid|20|major allergen variant Cor a 1.0403 [C	Corylus avellana	0.728	81of81	7.9e-41	0.662	160	gi|11762104	GO!
99	gi|1991455314|gid|20|Chain A, Major allergen variant Cor	Corylus avellana	0.728	81of81	1.4e-40	0.66	159	gi|1991455314	GO!
100	gi|11762106|gid|20|major allergen variant Cor a 1.0404 [C	Corylus avellana	0.725	81of81	3.3e-41	0.669	160	gi|11762106	GO!
101	gi|212291470|gid|1245|Fag s 1 pollen allergen [Fagus sylv	Fagus sylvatica	0.725	81of81	8.3e-40	0.656	160	gi|212291470	GO!
102	gi|1104688661|gid|2595|pathogenesis related protein 10 [J	Juglans regia	0.725	81of81	6.2e-40	0.669	160	gi|1104688661	GO!
103	gi|1313972|gid|659|major allergen Mal d1 [Malus x domesti	Malus x domestica	0.725	81of81	6.6e-39	0.644	160	gi|1313972	GO!
104	gi|16555781|gid|412|ypr10 [Castanea sativa]	Castanea sativa	0.725	81of81	4.4e-41	0.681	160	gi|16555781	GO!
105	gi|1313970|gid|659|major allergen Mal d1 [Malus x domesti	Malus x domestica	0.713	81of81	3.6e-39	0.644	160	gi|1313970	GO!
106	gi|212291472|gid|1245|Fag s 1 pollen allergen [Fagus sylv	Fagus sylvatica	0.713	81of81	3e-40	0.656	160	gi|212291472	GO!
107	gi|1313966|gid|659|major allergen Mal d 1 [Malus x domest	Malus x domestica	0.688	81of81	2e-36	0.625	160	gi|1313966	GO!
108	gi|1780564817|gid|3060|Que i 1 allergen [Quercus ilex]	Quercus ilex	0.6873	81of81	4.8e-34	0.597	159	gi|1780564817	GO!
109	gi|212291464|gid|412|Cas s 1 pollen allergen [Castanea sa	Castanea sativa	0.6755	81of81	3.1e-34	0.591	159	gi|212291464	GO!
110	gi|167472849|gid|105|pollen allergen Que a 1 isoform [Que	Quercus alba	0.675	81of81	9e-36	0.591	159	gi|167472849	GO!
111	gi|15418738|gid|659|ribonuclease-like PR-10b [Malus domes	Malus x domestica	0.6626	81of81	1.9e-35	0.606	160	gi|15418738	GO!
112	gi|212291468|gid|412|Cas s 1 pollen allergen [Castanea sa	Castanea sativa	0.6626	81of81	4.8e-34	0.585	159	gi|212291468	GO!
113	gi|27922941|gid|659|major allergen Mal d 1 [Malus x domes	Malus x domestica	0.6626	81of81	1.6e-35	0.606	160	gi|27922941	GO!
114	gi|212291466|gid|412|Cas s 1 pollen allergen [Castanea sa	Castanea sativa	0.6626	81of81	6.4e-34	0.585	159	gi|212291466	GO!
115	gi|1316209040|gid|105|Que m 1 pollen allergen, partial [Q	Quercus mongolica	0.662	81of81	9.5e-35	0.579	159	gi|1316209040	GO!
116	gi|260600660|gid|540|Fra a 2 allergen [Fragaria x ananass	Fragaria x ananassa	0.65	81of81	3.6e-34	0.591	159	gi|260600660	GO!
117	gi|167472847|gid|105|pollen allergen Que a 1 isoform [Que	Quercus alba	0.6498	81of81	3.2e-33	0.585	159	gi|167472847	GO!
118	gi|167472851|gid|105|pollen allergen Que a 1 isoform [Que	Quercus alba	0.6498	81of81	3.8e-33	0.572	159	gi|167472851	GO!
119	gi|394986655|gid|3349|Betv1-like protein [Cannabis sativa	Cannabis sativa	0.637	81of81	2.1e-33	0.54	161	gi|394986655	GO!
120	gi|2677826|gid|239|major allergen protein homolog [Prunus	Prunus armeniaca	0.637	81of81	2.8e-36	0.6	160	gi|2677826	GO!
121	gi|14423877|gid|231|Major allergen Pyr c 1	Pyrus communis	0.6251	81of81	1e-33	0.575	160	gi|14423877	GO!
122	gi|54311119|gid|1762|18 kD winter accumulating protein C	Morus bombycis	0.6251	81of81	2.4e-30	0.525	160	gi|54311119	GO!
123	gi|190613871|gid|1884|putative allergen Pru du 1.01 [Prun	Prunus dulcis x Prunus persica	0.6251	81of81	2.8e-36	0.587	160	gi|190613871	GO!
124	gi|82492265|gid|239|major allergen Pru p 1 [Prunus persic	Prunus persica	0.6251	81of81	1.1e-36	0.594	160	gi|82492265	GO!
125	gi|1917169569|gid|3300|pathogenesis-related 10 Que ac 1.0	Quercus acutissima	0.6251	81of81	3.1e-34	0.581	160	gi|1917169569	GO!
126	gi|54311115|gid|1762|18 kD winter accumulating protein A	Morus bombycis	0.6251	81of81	4.6e-32	0.538	160	gi|54311115	GO!
127	gi|1513216|gid|239|cherry-allergen PRUA1	Prunus avium	0.625	81of81	6.3e-37	0.594	160	gi|1513216	GO!
128	gi|260600662|gid|540|Fra a 3 allergen [Fragaria x ananass	Fragaria x ananassa	0.625	81of81	6.1e-35	0.587	160	gi|260600662	GO!
129	gi|886683|gid|659|major allergen [Malus x domestica]	Malus x domestica	0.613	81of81	1.3e-33	0.563	160	gi|886683	GO!
130	gi|21685277|gid|659|major allergen d 1 [Malus x domestica	Malus x domestica	0.613	81of81	5.8e-33	0.566	159	gi|21685277	GO!
131	gi|4590378|gid|659|major allergen mal d 1 [Malus x domest	Malus x domestica	0.613	81of81	2.8e-33	0.569	160	gi|4590378	GO!
132	gi|4590380|gid|659|major allergen mal d 1 [Malus x domest	Malus x domestica	0.613	81of81	2.8e-33	0.563	160	gi|4590380	GO!
133	gi|4590368|gid|659|major allergen mal d 1 [Malus x domest	Malus x domestica	0.613	81of81	1.6e-33	0.563	160	gi|4590368	GO!
134	gi|748758672|gid|239|Pru p 1.0301 [Prunus persica]	Prunus persica	0.613	81of81	1.9e-35	0.587	160	gi|748758672	GO!
135	gi|15418742|gid|659|ribonuclease-like PR-10c [Malus domes	Malus x domestica	0.613	81of81	5.9e-33	0.563	160	gi|15418742	GO!
136	gi|4590388|gid|659|major allergen mal d 1 [Malus x domest	Malus x domestica	0.613	81of81	2.8e-33	0.563	160	gi|4590388	GO!
137	gi|4590376|gid|659|major allergen mal d 1 [Malus x domest	Malus x domestica	0.613	81of81	1.6e-33	0.569	160	gi|4590376	GO!
138	gi|4590366|gid|659|major allergen mal d 1 [Malus x domest	Malus x domestica	0.613	81of81	2.1e-33	0.563	160	gi|4590366	GO!
139	gi|4768879|gid|659|major allergen Mal d 1 [Malus x domest	Malus x domestica	0.613	81of81	1.2e-33	0.569	160	gi|4768879	GO!
140	gi|862307|gid|659|Ap15 [Malus x domestica]	Malus x domestica	0.613	81of81	8.6e-34	0.569	160	gi|862307	GO!
141	gi|747852|gid|659|Mal d 1 [Malus domestica]	Malus x domestica	0.613	81of81	2.4e-33	0.563	160	gi|747852	GO!
142	gi|4590364|gid|659|major allergen mal d 1 [Malus x domest	Malus x domestica	0.613	81of81	8.6e-34	0.569	160	gi|4590364	GO!
143	gi|4590382|gid|659|major allergen mal d 1 [Malus x domest	Malus x domestica	0.613	81of81	2.4e-33	0.563	160	gi|4590382	GO!
144	gi|610664572|gid|1762|18 kDa winter accumulating protein	Morus alba var. atropurpurea	0.613	81of81	1.4e-30	0.519	160	gi|610664572	GO!
145	gi|90185684|gid|540|Major strawberry allergen Fra a 1-D [	Fragaria x ananassa	0.6004	81of81	5.1e-33	0.544	160	gi|90185684	GO!
146	gi|15418744|gid|659|ribonuclease-like PR-10a [Malus domes	Malus x domestica	0.6004	81of81	2.1e-33	0.563	160	gi|15418744	GO!
147	gi|90185682|gid|540|Major strawberry allergen Fra a 1-B [	Fragaria x ananassa	0.6004	81of81	1.4e-33	0.55	160	gi|90185682	GO!
148	gi|159162378|gid|239|Chain A, Solution Structure Of The M	Prunus avium	0.6004	81of81	6.7e-36	0.585	159	gi|159162378	GO!
149	gi|2443824|gid|659|major allergen Mal d 1 [Malus x domest	Malus x domestica	0.6004	81of81	1.8e-33	0.563	160	gi|2443824	GO!
150	gi|110180525|gid|913|putative allergen Rub i 1 [Rubus ida	Rubus idaeus	0.6004	81of81	8.2e-27	0.559	136	gi|110180525	GO!
151	gi|44409474|gid|239|major cherry allergen Pru av 1.0202 [	Prunus avium	0.6	81of81	2e-34	0.569	160	gi|44409474	GO!
152	gi|748758670|gid|239|Pru p 1.0201 [Prunus persica]	Prunus persica	0.6	81of81	7.1e-35	0.569	160	gi|748758670	GO!
153	gi|1394298081|gid|540|Fra a 1 allergen [Fragaria x ananas	Fragaria x ananassa	0.5876	81of81	1.2e-33	0.538	160	gi|1394298081	GO!
154	gi|88082485|gid|540|Fra a 1-A allergen [Fragaria x ananas	Fragaria x ananassa	0.5876	81of81	1.8e-33	0.538	160	gi|88082485	GO!
155	gi|90185692|gid|540|Major strawberry allergen Fra a 1-E [	Fragaria x ananassa	0.5876	81of81	3.3e-33	0.538	160	gi|90185692	GO!
156	gi|90185688|gid|540|Major strawberry allergen Fra a 1-C [	Fragaria x ananassa	0.5876	81of81	3e-32	0.538	160	gi|90185688	GO!
157	gi|44409496|gid|239|major cherry allergen Pru av 1.0203 [	Prunus avium	0.587	81of81	3.3e-33	0.55	160	gi|44409496	GO!
158	gi|44409451|gid|239|major cherry allergen Pru av 1.0201 [	Prunus avium	0.587	81of81	2.1e-33	0.55	160	gi|44409451	GO!
159	gi|281552898|gid|1330|bet v 1 related allergen [Actinidia	Actinidia deliciosa	0.563	81of81	2.9e-27	0.503	157	gi|281552898	GO!
160	gi|298736|gid|21|isoallergen {N-terminal} [birch, pollen,	Betula sp.	0.5623	19of81	1.2e-13	0.882	51	gi|298736	GO!
161	gi|281552896|gid|1330|bet v 1 related allergen [Actinidia	Actinidia chinensis	0.525	81of81	7.8e-28	0.503	157	gi|281552896	GO!
162	gi|320545|gid|21|major pollen allergen Bet v I - European	Betula pendula	0.5126	16of81	4.7e-12	0.804	51	gi|320545	GO!
163	gi|239734|gid|21|Bet v I=major allergen [Betula verrucosa	Betula pendula	0.5122	14of81	1.6e-12	0.953	43	gi|239734	GO!
164	gi|18744|gid|571|Pathogenesis-related protein [Glycine ma	Glycine max	0.512	81of81	1.1e-26	0.481	160	gi|18744	GO!
165	gi|37499626|gid|288|Ara h 8 allergen [Arachis hypogaea]	Arachis hypogaea	0.512	81of81	1.8e-25	0.465	159	gi|37499626	GO!
166	gi|60418924|gid|767|pathogenesis-related protein 10 [Vign	Vigna radiata	0.5	81of81	7.5e-23	0.445	155	gi|60418924	GO!
167	gi|169786740|gid|288|Ara h 8 allergen isoform 3 [Arachis	Arachis hypogaea	0.5	81of81	1.2e-24	0.447	159	gi|169786740	GO!
168	gi|302379153|gid|486|PRP-like protein [Daucus carota]	Daucus carota	0.4878	73of81	4.3e-22	0.432	155	gi|302379153	GO!
169	gi|302379157|gid|486|PRP-like protein [Daucus carota]	Daucus carota	0.4878	81of81	1.7e-23	0.452	155	gi|302379157	GO!
170	gi|302379159|gid|486|PRP-like protein [Daucus carota]	Daucus carota	0.4878	81of81	1.5e-23	0.452	155	gi|302379159	GO!
171	gi|19912791|gid|486|pathogenesis-related protein-like pro	Daucus carota	0.4878	76of81	7.4e-23	0.445	155	gi|19912791	GO!
172	gi|302379151|gid|486|PRP-like protein [Daucus carota]	Daucus carota	0.4878	73of81	3.7e-22	0.432	155	gi|302379151	GO!
173	gi|302379155|gid|486|PRP-like protein [Daucus carota]	Daucus carota	0.4878	73of81	2.1e-22	0.432	155	gi|302379155	GO!
174	gi|2887310|gid|2072|TSI-1 protein [Solanum lycopersicum]	Solanum lycopersicum (Lycopersicon esculentum)	0.487	67of81	5e-22	0.42	150	gi|2887310	GO!
175	gi|565380238|gid|2072|PR10 protein [Solanum lycopersicum]	Solanum lycopersicum (Lycopersicon esculentum)	0.487	81of81	5.1e-25	0.447	159	gi|565380238	GO!
176	gi|145904610|gid|288|Ara h 8 allergen isoform [Arachis hy	Arachis hypogaea	0.487	54of81	1.3e-22	0.419	155	gi|145904610	GO!
177	gi|302379147|gid|486|PRP-like protein [Daucus carota]	Daucus carota	0.475	79of81	7.4e-23	0.439	155	gi|302379147	GO!
178	gi|302379149|gid|486|PRP-like protein [Daucus carota]	Daucus carota	0.475	81of81	2.6e-23	0.445	155	gi|302379149	GO!
179	gi|565380268|gid|2072|PR10 protein [Solanum lycopersicum]	Solanum lycopersicum (Lycopersicon esculentum)	0.463	81of81	1.4e-24	0.428	159	gi|565380268	GO!
180	gi|1346568|gid|305|Major allergen Api g 1 (Api g 1.0101)	Apium graveolens	0.45	81of81	3.7e-22	0.419	155	gi|1346568	GO!
181	gi|110676574|gid|288|pathogenesis-related protein 10 [Ara	Arachis hypogaea	0.45	79of81	1.7e-23	0.434	159	gi|110676574	GO!
182	gi|320546|gid|342|major pollen allergen Bet v II - Europe	Betula pendula	0.4499	11of81	8.1e-10	0.857	42	gi|320546	GO!
183	gi|298737|gid|342|isoallergen {N-terminal} [birch, pollen	Betula sp.	0.4499	11of81	9.4e-10	0.857	42	gi|298737	GO!
184	gi|14423646|gid|305|Major allergen Api g 2 (Api g 1.0201)	Apium graveolens	0.438	65of81	2.4e-20	0.4	155	gi|14423646	GO!
185	gi|1939884368|gid|305|RecName: Full=Allergen Pet c 1; Alt	Petroselinum crispum	0.42	70of81	1.1e-17	0.394	155	gi|1939884368	GO!
186	gi|18652047|gid|486|major allergen isoform Dau c 1.0201 [	Daucus carota	0.4004	52of81	5.6e-20	0.394	155	gi|18652047	GO!
187	gi|2154734|gid|486|major allergen [Daucus carota]	Daucus carota	0.4	65of81	1e-19	0.381	155	gi|2154734	GO!
188	gi|1335877|gid|486|pathogenesis-related protein	Daucus carota	0.4	52of81	2.7e-19	0.374	155	gi|1335877	GO!
189	gi|2154736|gid|486|major allergen Dau c 1/1 [Daucus carot	Daucus carota	0.4	61of81	1.6e-19	0.381	155	gi|2154736	GO!
190	gi|2154732|gid|486|major allergen [Daucus carota]	Daucus carota	0.4	55of81	6.9e-19	0.374	155	gi|2154732	GO!
191	gi|1663522|gid|486|cr16 [Daucus carota]	Daucus carota	0.4	52of81	1.8e-19	0.374	155	gi|1663522	GO!
192	gi|239735|gid|410|Car b I=major allergen [Carpinus betulu	Carpinus betulus	0.3876	4of81	2.8e-09	0.816	38	gi|239735	GO!
193	gi|4190976|gid|2073|cytokinin-specific binding protein [V	Vigna radiata	0.383	16of81	1.9e-08	0.316	152	gi|4190976	GO!
194	gi|1559988738|gid|2073|RecName: Full=Phytohormone-binding	Vigna radiata var. radiata	0.383	16of81	1.9e-08	0.316	152	gi|1559988738	GO!
(B) MaPR10-BeB5
Hit	Defline	Species	Best	# Hits	Full Alignment			Links
#			%ID	> 35%	E-val	%ID	length	NCBI	Details
1	gi|1321714|gid|21|major allergen Bet v 1 [Betula pendula]	Betula pendula	0.45	45of81	2.5e-16	0.365	159	gi|1321714	GO!
2	gi|261407|gid|34|Aln g I [Alnus glutinosa]	Alnus glutinosa	0.45	45of81	7.8e-17	0.371	159	gi|261407	GO!
3	gi|1321731|gid|20|major allergen Cor a 1 [Corylus avellan	Corylus avellana	0.45	75of81	4.8e-19	0.405	158	gi|1321731	GO!
4	gi|565380238|gid|2072|PR10 protein [Solanum lycopersicum]	Solanum lycopersicum (Lycopersicon esculentum)	0.444	63of81	1.8e-19	0.391	161	gi|565380238	GO!
5	gi|1545897|gid|410|pollen allergen Car b 1 [Carpinus betu	Carpinus betulus	0.438	63of81	5e-18	0.384	159	gi|1545897	GO!
6	gi|1542869|gid|21|pollen allergen Bet v 1 [Betula pendula	Betula pendula	0.438	49of81	1.4e-16	0.352	159	gi|1542869	GO!
7	gi|1545895|gid|410|pollen allergen Car b 1 [Carpinus betu	Carpinus betulus	0.438	63of81	6.6e-18	0.384	159	gi|1545895	GO!
8	gi|4006945|gid|21|pollen allergen Betv1, isoform at10 [Be	Betula pendula	0.438	45of81	7.8e-17	0.352	159	gi|4006945	GO!
9	gi|1542867|gid|21|pollen allergen Bet v 1 [Betula pendula	Betula pendula	0.438	55of81	1.6e-17	0.365	159	gi|1542867	GO!
10	gi|15418738|gid|659|ribonuclease-like PR-10b [Malus domes	Malus x domestica	0.438	46of81	2.2e-15	0.361	158	gi|15418738	GO!
11	gi|2887310|gid|2072|TSI-1 protein [Solanum lycopersicum]	Solanum lycopersicum (Lycopersicon esculentum)	0.4254	53of81	2.5e-15	0.364	140	gi|2887310	GO!
12	gi|4376216|gid|21|pollen allergen, Betv1 [Betula pendula]	Betula pendula	0.425	52of81	5.7e-18	0.367	158	gi|4376216	GO!
13	gi|17938|gid|21|Bet v 1 - like [Betula pendula]	Betula pendula	0.425	37of81	2.5e-16	0.346	159	gi|17938	GO!
14	gi|560188693|gid|21|Chain A, Crystal Structure Of A Varia	Betula pendula	0.425	37of81	2.5e-16	0.348	158	gi|560188693	GO!
15	gi|4006965|gid|21|pollen allergen Betv1, isoform at5 [Bet	Betula pendula	0.425	33of81	1.4e-15	0.333	159	gi|4006965	GO!
16	gi|560188694|gid|21|Chain A, Crystal Structure Of An Unus	Betula pendula	0.425	37of81	3.3e-16	0.358	151	gi|560188694	GO!
17	gi|565807648|gid|21|Chain A, Crystal Structure Of A Unusu	Betula pendula	0.425	37of81	3.3e-16	0.358	151	gi|565807648	GO!
18	gi|2564220|gid|21|pollen allergen Betv1 [Betula pendula]	Betula pendula	0.425	52of81	7.6e-18	0.358	159	gi|2564220	GO!
19	gi|4006953|gid|21|pollen allergen Betv1, isoform at37 [Be	Betula pendula	0.425	54of81	2.4e-17	0.358	159	gi|4006953	GO!
20	gi|1321722|gid|21|major allergen Bet v 1 [Betula pendula]	Betula pendula	0.425	37of81	2.2e-15	0.34	159	gi|1321722	GO!
21	gi|534900|gid|21|1 Sc2 [Betula pendula]	Betula pendula	0.425	59of81	1.6e-17	0.384	151	gi|534900	GO!
22	gi|4376219|gid|21|pollen allergen, Betv1 [Betula pendula]	Betula pendula	0.425	37of81	1.9e-15	0.358	151	gi|4376219	GO!
23	gi|1321726|gid|21|major allergen Bet v 1 [Betula pendula]	Betula pendula	0.425	44of81	6.7e-17	0.358	159	gi|1321726	GO!
24	gi|2564228|gid|21|pollen allergen Betv1 [Betula pendula]	Betula pendula	0.425	52of81	8.8e-18	0.358	159	gi|2564228	GO!
25	gi|27922941|gid|659|major allergen Mal d 1 [Malus x domes	Malus x domestica	0.425	46of81	5.9e-16	0.367	158	gi|27922941	GO!
26	gi|1321724|gid|21|major allergen Bet v 1 [Betula pendula]	Betula pendula	0.425	37of81	1.9e-15	0.34	159	gi|1321724	GO!
27	gi|38492423|gid|21|Chain A, Birch Pollen Allergen Bet V 1	Betula pendula	0.425	41of81	4.4e-16	0.348	155	gi|38492423	GO!
28	gi|4006957|gid|21|pollen allergen Betv1, isoform at45 [Be	Betula pendula	0.425	37of81	1.4e-16	0.346	159	gi|4006957	GO!
29	gi|4590396|gid|21|isoallergen bet v 1 b3 [Betula pendula]	Betula pendula	0.425	41of81	1.2e-16	0.352	159	gi|4590396	GO!
30	gi|83722364|gid|21|major allergen Bet v 1.01E [Betula pen	Betula pendula	0.425	45of81	1.5e-16	0.349	149	gi|83722364	GO!
31	gi|12583681|gid|21|Bet vI jap1 [Betula platyphylla]	Betula platyphylla	0.425	52of81	1.6e-17	0.352	159	gi|12583681	GO!
32	gi|1321718|gid|21|major allergen Bet v 1 [Betula pendula]	Betula pendula	0.425	37of81	9.2e-16	0.34	159	gi|1321718	GO!
33	gi|402747|gid|410|Car b I, partial [Carpinus betulus]	Carpinus betulus	0.425	37of81	1.6e-16	0.364	151	gi|402747	GO!
34	gi|4376221|gid|21|pollen allergen, Betv1 [Betula pendula]	Betula pendula	0.425	37of81	2.9e-15	0.351	151	gi|4376221	GO!
35	gi|159162097|gid|21|Chain A, Birch Pollen Allergen Bet V	Betula pendula	0.425	37of81	2.8e-16	0.348	155	gi|159162097	GO!
36	gi|4006959|gid|21|pollen allergen Betv1, isoform at50 [Be	Betula pendula	0.425	27of81	2.5e-16	0.346	159	gi|4006959	GO!
37	gi|1321720|gid|21|major allergen Bet v 1 [Betula pendula]	Betula pendula	0.425	37of81	2.5e-16	0.346	159	gi|1321720	GO!
38	gi|534910|gid|21|1-Sc1 [Betula pendula]	Betula pendula	0.425	59of81	1.8e-17	0.384	151	gi|534910	GO!
39	gi|452732|gid|21|Bet v 1 d [Betula pendula]	Betula pendula	0.425	52of81	4.3e-18	0.367	158	gi|452732	GO!
40	gi|1542873|gid|21|pollen allergen Bet v 1 [Betula pendula	Betula pendula	0.425	37of81	2.1e-16	0.346	159	gi|1542873	GO!
41	gi|4376220|gid|21|pollen allergen, Betv1 [Betula pendula]	Betula pendula	0.425	37of81	1.8e-16	0.348	155	gi|4376220	GO!
42	gi|2564224|gid|21|pollen allergen Betv1 [Betula pendula]	Betula pendula	0.425	37of81	1.6e-16	0.346	159	gi|2564224	GO!
43	gi|560188692|gid|21|Chain B, Crystal Structure Of A Dimer	Betula pendula	0.425	37of81	3.3e-16	0.358	151	gi|560188692	GO!
44	gi|4006947|gid|21|pollen allergen Betv1, isoform at14 [Be	Betula pendula	0.425	33of81	4.5e-13	0.368	117	gi|4006947	GO!
45	gi|1313966|gid|659|major allergen Mal d 1 [Malus x domest	Malus x domestica	0.425	46of81	9.1e-16	0.352	159	gi|1313966	GO!
46	gi|955264732|gid|21|Chain D, Crystal Structure Of Birch P	Betula pendula	0.425	49of81	2.1e-16	0.355	155	gi|955264732	GO!
47	gi|1542865|gid|21|pollen allergen Bet v 1 [Betula pendula	Betula pendula	0.425	54of81	3.3e-17	0.358	159	gi|1542865	GO!
48	gi|4590394|gid|21|isoallergen Bet v 1 b2 [Betula pendula]	Betula pendula	0.425	37of81	1.4e-15	0.34	159	gi|4590394	GO!
49	gi|1168710|gid|21|Major pollen allergen Bet v 1-M/N (Bet	Betula pendula	0.425	37of81	2.5e-15	0.351	151	gi|1168710	GO!
50	gi|54311115|gid|1762|18 kD winter accumulating protein A	Morus bombycis	0.4128	38of81	1.2e-15	0.368	152	gi|54311115	GO!
51	gi|565380268|gid|2072|PR10 protein [Solanum lycopersicum]	Solanum lycopersicum (Lycopersicon esculentum)	0.4128	51of81	1.2e-17	0.373	161	gi|565380268	GO!
52	gi|610664572|gid|1762|18 kDa winter accumulating protein	Morus alba var. atropurpurea	0.4128	41of81	4.3e-16	0.375	152	gi|610664572	GO!
53	gi|1168706|gid|21|Major pollen allergen Bet v 1-G (Bet v	Betula pendula	0.412	52of81	2.8e-17	0.364	151	gi|1168706	GO!
54	gi|452744|gid|21|Bet v 1 l [Betula pendula]	Betula pendula	0.412	52of81	1.2e-17	0.352	159	gi|452744	GO!
55	gi|4006963|gid|21|pollen allergen Betv1, isoform at87 [Be	Betula pendula	0.412	27of81	7e-13	0.359	117	gi|4006963	GO!
56	gi|661918055|gid|21|Chain A, Crystal Structure Of Peroxin	Betula pendula	0.412	27of81	1.7e-14	0.338	151	gi|661918055	GO!
57	gi|4590392|gid|21|isoallergen bet v 1 b1 [Betula pendula]	Betula pendula	0.412	42of81	1.8e-17	0.358	159	gi|4590392	GO!
58	gi|550544347|gid|21|Chain A, Crystal Structure Of The Maj	Betula pendula	0.412	27of81	4.5e-15	0.344	151	gi|550544347	GO!
59	gi|4006928|gid|21|pollen allergen Betv1, isoform at8 [Bet	Betula pendula	0.412	42of81	2.8e-17	0.352	159	gi|4006928	GO!
60	gi|452734|gid|21|Bet v 1 e [Betula pendula]	Betula pendula	0.412	27of81	4.4e-16	0.346	159	gi|452734	GO!
61	gi|83722317|gid|21|major allergen Bet v 1.02C [Betula pen	Betula pendula	0.412	37of81	5.7e-14	0.338	145	gi|83722317	GO!
62	gi|4006961|gid|21|pollen allergen Betv1, isoform at59 [Be	Betula pendula	0.412	54of81	9e-17	0.352	159	gi|4006961	GO!
63	gi|1321728|gid|21|major allergen Bet v 1 [Betula pendula]	Betula pendula	0.412	26of81	4.5e-15	0.34	159	gi|1321728	GO!
64	gi|11514622|gid|21|Chain A, Birch Pollen Allergen Bet V 1	Betula pendula	0.412	34of81	5.9e-16	0.342	155	gi|11514622	GO!
65	gi|452742|gid|21|Bet v 1 k [Betula pendula]	Betula pendula	0.412	37of81	5.2e-15	0.344	151	gi|452742	GO!
66	gi|452730|gid|21|Bet v 1 c [Betula pendula]	Betula pendula	0.412	37of81	4.5e-15	0.344	151	gi|452730	GO!
67	gi|1542863|gid|21|pollen allergen Bet v 1 [Betula pendula	Betula pendula	0.412	27of81	2.9e-16	0.34	159	gi|1542863	GO!
68	gi|452740|gid|21|Bet v 1 j [Betula pendula]	Betula pendula	0.412	27of81	2.5e-16	0.346	159	gi|452740	GO!
69	gi|1321716|gid|21|major allergen Bet v 1 [Betula pendula]	Betula pendula	0.412	27of81	3.8e-16	0.346	159	gi|1321716	GO!
70	gi|1542871|gid|21|pollen allergen Bet v 1 [Betula pendula	Betula pendula	0.412	27of81	2.5e-16	0.34	159	gi|1542871	GO!
71	gi|4006955|gid|21|pollen allergen Betv1, isoform at42 [Be	Betula pendula	0.412	30of81	1.4e-15	0.333	159	gi|4006955	GO!
72	gi|450885|gid|21|Bet v 1b [Betula pendula]	Betula pendula	0.412	37of81	3.9e-15	0.333	159	gi|450885	GO!
73	gi|2564222|gid|21|pollen allergen Betv1 [Betula pendula]	Betula pendula	0.412	27of81	3.8e-16	0.34	159	gi|2564222	GO!
74	gi|452736|gid|21|Bet v 1 f [Betula pendula]	Betula pendula	0.412	27of81	1.6e-16	0.354	158	gi|452736	GO!
75	gi|12583685|gid|21|Bet vI jap3 [Betula platyphylla]	Betula platyphylla	0.412	42of81	5.8e-17	0.346	159	gi|12583685	GO!
76	gi|1542861|gid|21|pollen allergen Bet v 1 [Betula pendula	Betula pendula	0.412	42of81	2.8e-17	0.352	159	gi|1542861	GO!
77	gi|2414158|gid|21|major allergen Bet v 1 [Betula pendula]	Betula pendula	0.412	27of81	2.5e-16	0.346	159	gi|2414158	GO!
78	gi|4376222|gid|21|pollen allergen, Betv1 [Betula pendula]	Betula pendula	0.4	18of81	2.5e-15	0.348	158	gi|4376222	GO!
79	gi|12583683|gid|21|Bet vI jap2 [Betula platyphylla]	Betula platyphylla	0.4	29of81	2.1e-16	0.34	159	gi|12583683	GO!
80	gi|1545879|gid|410|pollen allergen Car b 1 [Carpinus betu	Carpinus betulus	0.4	32of81	7.9e-16	0.327	159	gi|1545879	GO!
81	gi|1545881|gid|410|pollen allergen Car b 1 [Carpinus betu	Carpinus betulus	0.4	32of81	1.4e-16	0.34	159	gi|1545881	GO!
82	gi|167472845|gid|410|pollen allergen Car b 1 isoform [Car	Carpinus betulus	0.4	36of81	1.2e-16	0.34	159	gi|167472845	GO!
83	gi|4006967|gid|21|pollen allergen Betv1, isoform at7 [Bet	Betula pendula	0.4	37of81	1e-16	0.346	159	gi|4006967	GO!
84	gi|167472839|gid|410|pollen allergen Car b 1 isoform [Car	Carpinus betulus	0.4	40of81	2.1e-16	0.346	159	gi|167472839	GO!
85	gi|212291474|gid|1245|Fag s 1 pollen allergen [Fagus sylv	Fagus sylvatica	0.4	29of81	1.2e-17	0.38	158	gi|212291474	GO!
86	gi|22684|gid|20|major allergen [Corylus avellana]	Corylus avellana	0.4	52of81	2.9e-16	0.352	159	gi|22684	GO!
87	gi|167472841|gid|410|pollen allergen Car b 1 isoform [Car	Carpinus betulus	0.4	32of81	5.1e-16	0.333	159	gi|167472841	GO!
88	gi|1545889|gid|410|pollen allergen Car b 1 [Carpinus betu	Carpinus betulus	0.4	39of81	1.6e-16	0.346	159	gi|1545889	GO!
89	gi|167472837|gid|410|pollen allergen Car b 1 isoform [Car	Carpinus betulus	0.4	39of81	1.4e-16	0.346	159	gi|167472837	GO!
90	gi|402743|gid|410|Car b I, partial [Carpinus betulus]	Carpinus betulus	0.4	32of81	1.8e-16	0.344	151	gi|402743	GO!
91	gi|167472843|gid|410|pollen allergen Car b 1 isoform [Car	Carpinus betulus	0.4	32of81	2.5e-16	0.34	159	gi|167472843	GO!
92	gi|748758670|gid|239|Pru p 1.0201 [Prunus persica]	Prunus persica	0.4	32of81	1e-17	0.358	159	gi|748758670	GO!
93	gi|1545875|gid|410|pollen allergen Car b 1 [Carpinus betu	Carpinus betulus	0.4	32of81	1.4e-15	0.327	159	gi|1545875	GO!
94	gi|402745|gid|410|Car b I [Carpinus betulus]	Carpinus betulus	0.4	32of81	3.8e-16	0.351	151	gi|402745	GO!
95	gi|1545893|gid|410|pollen allergen Car b 1 [Carpinus betu	Carpinus betulus	0.4	28of81	6.9e-16	0.34	159	gi|1545893	GO!
96	gi|22690|gid|20|major allergen [Corylus avellana]	Corylus avellana	0.4	56of81	9e-17	0.361	158	gi|22690	GO!
97	gi|212291472|gid|1245|Fag s 1 pollen allergen [Fagus sylv	Fagus sylvatica	0.4	15of81	1.8e-17	0.373	158	gi|212291472	GO!
98	gi|212291470|gid|1245|Fag s 1 pollen allergen [Fagus sylv	Fagus sylvatica	0.4	29of81	1.4e-17	0.38	158	gi|212291470	GO!
99	gi|1104688661|gid|2595|pathogenesis related protein 10 [J	Juglans regia	0.3999	21of81	2.1e-16	0.348	158	gi|1104688661	GO!
100	gi|534898|gid|21|1 Sc-3 [Betula pendula]	Betula pendula	0.388	23of81	2.4e-17	0.371	151	gi|534898	GO!
101	gi|1313972|gid|659|major allergen Mal d1 [Malus x domesti	Malus x domestica	0.388	23of81	2.4e-17	0.34	159	gi|1313972	GO!
102	gi|1545877|gid|410|pollen allergen Car b 1 [Carpinus betu	Carpinus betulus	0.388	27of81	1.6e-15	0.327	159	gi|1545877	GO!
103	gi|44409474|gid|239|major cherry allergen Pru av 1.0202 [	Prunus avium	0.388	22of81	2.4e-17	0.346	159	gi|44409474	GO!
104	gi|22686|gid|20|major allergen [Corylus avellana]	Corylus avellana	0.388	39of81	5.9e-16	0.354	158	gi|22686	GO!
105	gi|300872535|gid|1632|pollen allergen [Ostrya carpinifoli	Ostrya carpinifolia	0.388	27of81	2.9e-16	0.34	159	gi|300872535	GO!
106	gi|44409451|gid|239|major cherry allergen Pru av 1.0201 [	Prunus avium	0.388	22of81	6.7e-17	0.342	158	gi|44409451	GO!
107	gi|2677826|gid|239|major allergen protein homolog [Prunus	Prunus armeniaca	0.388	24of81	2.9e-16	0.354	158	gi|2677826	GO!
108	gi|1313968|gid|659|major allergen Mal d 1 [Malus x domest	Malus x domestica	0.388	23of81	4.3e-17	0.34	159	gi|1313968	GO!
109	gi|1313970|gid|659|major allergen Mal d1 [Malus x domesti	Malus x domestica	0.388	23of81	5.8e-17	0.34	159	gi|1313970	GO!
110	gi|748758672|gid|239|Pru p 1.0301 [Prunus persica]	Prunus persica	0.388	24of81	9e-17	0.348	158	gi|748758672	GO!
111	gi|1008580|gid|410|group 2 Car b 1=isoallergenic variant	Carpinus betulus	0.3753	14of81	1.8e-08	0.411	73	gi|1008580	GO!
112	gi|260600662|gid|540|Fra a 3 allergen [Fragaria x ananass	Fragaria x ananassa	0.3752	13of81	3.3e-16	0.342	158	gi|260600662	GO!
113	gi|54311119|gid|1762|18 kD winter accumulating protein C	Morus bombycis	0.3752	26of81	2.8e-17	0.375	152	gi|54311119	GO!
114	gi|82492265|gid|239|major allergen Pru p 1 [Prunus persic	Prunus persica	0.375	7of81	2.9e-15	0.323	158	gi|82492265	GO!
115	gi|1513216|gid|239|cherry-allergen PRUA1	Prunus avium	0.375	7of81	1.4e-15	0.323	158	gi|1513216	GO!
116	gi|190613871|gid|1884|putative allergen Pru du 1.01 [Prun	Prunus dulcis x Prunus persica	0.375	7of81	3.9e-15	0.323	158	gi|190613871	GO!
117	gi|394986655|gid|3349|Betv1-like protein [Cannabis sativa	Cannabis sativa	0.375	8of81	3.9e-15	0.327	159	gi|394986655	GO!
118	gi|44409496|gid|239|major cherry allergen Pru av 1.0203 [	Prunus avium	0.375	10of81	5e-17	0.34	159	gi|44409496	GO!
119	gi|1991455313|gid|20|Chain A, Major allergen Cor a 1.0401	Corylus avellana	0.37	5of81	6.9e-16	0.349	152	gi|1991455313	GO!
120	gi|11762106|gid|20|major allergen variant Cor a 1.0404 [C	Corylus avellana	0.37	5of81	6.9e-16	0.344	160	gi|11762106	GO!
121	gi|4590364|gid|659|major allergen mal d 1 [Malus x domest	Malus x domestica	0.3628	13of81	9.3e-15	0.323	158	gi|4590364	GO!
122	gi|862307|gid|659|Ap15 [Malus x domestica]	Malus x domestica	0.3628	14of81	3.9e-15	0.335	158	gi|862307	GO!
123	gi|4590380|gid|659|major allergen mal d 1 [Malus x domest	Malus x domestica	0.3628	13of81	1.2e-14	0.323	158	gi|4590380	GO!
124	gi|4590388|gid|659|major allergen mal d 1 [Malus x domest	Malus x domestica	0.3628	14of81	2.2e-15	0.335	158	gi|4590388	GO!
125	gi|4590368|gid|659|major allergen mal d 1 [Malus x domest	Malus x domestica	0.3628	14of81	3.4e-15	0.335	158	gi|4590368	GO!
126	gi|747852|gid|659|Mal d 1 [Malus domestica]	Malus x domestica	0.3628	13of81	2.2e-14	0.323	158	gi|747852	GO!
127	gi|4590382|gid|659|major allergen mal d 1 [Malus x domest	Malus x domestica	0.3628	13of81	2.6e-14	0.316	158	gi|4590382	GO!
128	gi|4590366|gid|659|major allergen mal d 1 [Malus x domest	Malus x domestica	0.3628	14of81	9.3e-15	0.329	158	gi|4590366	GO!
129	gi|21685277|gid|659|major allergen d 1 [Malus x domestica	Malus x domestica	0.3628	14of81	1.1e-14	0.335	158	gi|21685277	GO!
130	gi|4768879|gid|659|major allergen Mal d 1 [Malus x domest	Malus x domestica	0.3628	13of81	1.2e-14	0.323	158	gi|4768879	GO!
131	gi|886683|gid|659|major allergen [Malus x domestica]	Malus x domestica	0.3628	13of81	4.6e-14	0.323	158	gi|886683	GO!
132	gi|15418744|gid|659|ribonuclease-like PR-10a [Malus domes	Malus x domestica	0.3628	14of81	6.9e-15	0.335	158	gi|15418744	GO!
133	gi|15418742|gid|659|ribonuclease-like PR-10c [Malus domes	Malus x domestica	0.3627	9of81	4e-14	0.318	151	gi|15418742	GO!
134	gi|4590378|gid|659|major allergen mal d 1 [Malus x domest	Malus x domestica	0.3627	9of81	2.2e-14	0.318	151	gi|4590378	GO!
135	gi|110180525|gid|913|putative allergen Rub i 1 [Rubus ida	Rubus idaeus	0.3624	4of81	5.4e-12	0.319	135	gi|110180525	GO!
136	gi|260600660|gid|540|Fra a 2 allergen [Fragaria x ananass	Fragaria x ananassa	0.3624	9of81	1.2e-15	0.329	158	gi|260600660	GO!
137	gi|159162378|gid|239|Chain A, Solution Structure Of The M	Prunus avium	0.362	1of81	5.2e-15	0.316	158	gi|159162378	GO!
138	gi|167472847|gid|105|pollen allergen Que a 1 isoform [Que	Quercus alba	0.362	2of81	4e-13	0.333	150	gi|167472847	GO!
139	gi|1991455314|gid|20|Chain A, Major allergen variant Cor	Corylus avellana	0.358	4of81	2.5e-15	0.333	156	gi|1991455314	GO!
140	gi|11762104|gid|20|major allergen variant Cor a 1.0403 [C	Corylus avellana	0.358	4of81	3.4e-15	0.336	152	gi|11762104	GO!
141	gi|1008579|gid|410|group 1 Car b 1=isoallergenic variant	Carpinus betulus	0.3504	9of81	2.4e-08	0.384	73	gi|1008579	GO!
142	gi|1008578|gid|410|group 1 Car b 1=isoallergenic variant	Carpinus betulus	0.3504	9of81	3.7e-08	0.384	73	gi|1008578	GO!
143	gi|2443824|gid|659|major allergen Mal d 1 [Malus x domest	Malus x domestica	0.35	3of81	8e-15	0.329	158	gi|2443824	GO!
144	gi|14423877|gid|231|Major allergen Pyr c 1	Pyrus communis	0.35	3of81	3e-14	0.323	158	gi|14423877	GO!
145	gi|4590376|gid|659|major allergen mal d 1 [Malus x domest	Malus x domestica	0.35	3of81	3e-14	0.316	158	gi|4590376	GO!
(C) MaPR10-GNA5
Hit	Defline	Species	Best	# Hits	Full Alignment			Links
#			%ID	> 35%	E-val	%ID	length	NCBI	Details
1	gi|1321731|gid|20|major allergen Cor a 1 [Corylus avellan	Corylus avellana	0.438	64of81	3.4e-21	0.392	158	gi|1321731	GO!
2	gi|261407|gid|34|Aln g I [Alnus glutinosa]	Alnus glutinosa	0.438	37of81	2e-19	0.365	159	gi|261407	GO!
3	gi|1321714|gid|21|major allergen Bet v 1 [Betula pendula]	Betula pendula	0.438	37of81	7.7e-19	0.358	159	gi|1321714	GO!
4	gi|1545897|gid|410|pollen allergen Car b 1 [Carpinus betu	Carpinus betulus	0.425	50of81	5.1e-20	0.371	159	gi|1545897	GO!
5	gi|565380238|gid|2072|PR10 protein [Solanum lycopersicum]	Solanum lycopersicum (Lycopersicon esculentum)	0.425	52of81	8.7e-22	0.371	159	gi|565380238	GO!
6	gi|4006945|gid|21|pollen allergen Betv1, isoform at10 [Be	Betula pendula	0.425	42of81	2.3e-19	0.356	160	gi|4006945	GO!
7	gi|1542867|gid|21|pollen allergen Bet v 1 [Betula pendula	Betula pendula	0.425	63of81	3.6e-20	0.369	160	gi|1542867	GO!
8	gi|1542869|gid|21|pollen allergen Bet v 1 [Betula pendula	Betula pendula	0.425	42of81	4.6e-19	0.356	160	gi|1542869	GO!
9	gi|15418738|gid|659|ribonuclease-like PR-10b [Malus domes	Malus x domestica	0.425	44of81	1.4e-17	0.354	158	gi|15418738	GO!
10	gi|1545895|gid|410|pollen allergen Car b 1 [Carpinus betu	Carpinus betulus	0.425	50of81	7.2e-20	0.371	159	gi|1545895	GO!
11	gi|2887310|gid|2072|TSI-1 protein [Solanum lycopersicum]	Solanum lycopersicum (Lycopersicon esculentum)	0.4129	42of81	2.2e-17	0.38	121	gi|2887310	GO!
12	gi|54311115|gid|1762|18 kD winter accumulating protein A	Morus bombycis	0.4128	38of81	8.9e-19	0.368	152	gi|54311115	GO!
13	gi|610664572|gid|1762|18 kDa winter accumulating protein	Morus alba var. atropurpurea	0.4128	41of81	2.7e-19	0.375	152	gi|610664572	GO!
14	gi|27922941|gid|659|major allergen Mal d 1 [Malus x domes	Malus x domestica	0.4128	43of81	3e-18	0.361	158	gi|27922941	GO!
15	gi|4376219|gid|21|pollen allergen, Betv1 [Betula pendula]	Betula pendula	0.412	30of81	5.8e-18	0.355	152	gi|4376219	GO!
16	gi|1321726|gid|21|major allergen Bet v 1 [Betula pendula]	Betula pendula	0.412	31of81	1.7e-19	0.352	159	gi|1321726	GO!
17	gi|1321722|gid|21|major allergen Bet v 1 [Betula pendula]	Betula pendula	0.412	27of81	7e-18	0.338	160	gi|1321722	GO!
18	gi|4376220|gid|21|pollen allergen, Betv1 [Betula pendula]	Betula pendula	0.412	32of81	6.4e-19	0.353	156	gi|4376220	GO!
19	gi|4006965|gid|21|pollen allergen Betv1, isoform at5 [Bet	Betula pendula	0.412	30of81	4.2e-18	0.331	160	gi|4006965	GO!
20	gi|4590394|gid|21|isoallergen Bet v 1 b2 [Betula pendula]	Betula pendula	0.412	32of81	7e-18	0.344	160	gi|4590394	GO!
21	gi|2564224|gid|21|pollen allergen Betv1 [Betula pendula]	Betula pendula	0.412	32of81	5.5e-19	0.35	160	gi|2564224	GO!
22	gi|534900|gid|21|1 Sc2 [Betula pendula]	Betula pendula	0.412	57of81	4.3e-20	0.377	151	gi|534900	GO!
23	gi|2564228|gid|21|pollen allergen Betv1 [Betula pendula]	Betula pendula	0.412	44of81	1.8e-20	0.362	160	gi|2564228	GO!
24	gi|1168710|gid|21|Major pollen allergen Bet v 1-M/N (Bet	Betula pendula	0.412	27of81	8.3e-18	0.349	152	gi|1168710	GO!
25	gi|12583681|gid|21|Bet vI jap1 [Betula platyphylla]	Betula platyphylla	0.412	44of81	3.6e-20	0.356	160	gi|12583681	GO!
26	gi|4376216|gid|21|pollen allergen, Betv1 [Betula pendula]	Betula pendula	0.412	44of81	1.1e-20	0.371	159	gi|4376216	GO!
27	gi|1313966|gid|659|major allergen Mal d 1 [Malus x domest	Malus x domestica	0.412	43of81	4.9e-18	0.346	159	gi|1313966	GO!
28	gi|4006953|gid|21|pollen allergen Betv1, isoform at37 [Be	Betula pendula	0.412	50of81	6e-20	0.362	160	gi|4006953	GO!
29	gi|1542873|gid|21|pollen allergen Bet v 1 [Betula pendula	Betula pendula	0.412	32of81	7.7e-19	0.35	160	gi|1542873	GO!
30	gi|1321724|gid|21|major allergen Bet v 1 [Betula pendula]	Betula pendula	0.412	27of81	5.9e-18	0.338	160	gi|1321724	GO!
31	gi|402747|gid|410|Car b I, partial [Carpinus betulus]	Carpinus betulus	0.412	34of81	3e-18	0.351	151	gi|402747	GO!
32	gi|159162097|gid|21|Chain A, Birch Pollen Allergen Bet V	Betula pendula	0.412	32of81	1.1e-18	0.353	156	gi|159162097	GO!
33	gi|83722364|gid|21|major allergen Bet v 1.01E [Betula pen	Betula pendula	0.412	36of81	5e-19	0.353	150	gi|83722364	GO!
34	gi|1321718|gid|21|major allergen Bet v 1 [Betula pendula]	Betula pendula	0.412	30of81	2.5e-18	0.338	160	gi|1321718	GO!
35	gi|534910|gid|21|1-Sc1 [Betula pendula]	Betula pendula	0.412	57of81	5.1e-20	0.377	151	gi|534910	GO!
36	gi|17938|gid|21|Bet v 1 - like [Betula pendula]	Betula pendula	0.412	32of81	9.1e-19	0.35	160	gi|17938	GO!
37	gi|452732|gid|21|Bet v 1 d [Betula pendula]	Betula pendula	0.412	44of81	7.9e-21	0.371	159	gi|452732	GO!
38	gi|38492423|gid|21|Chain A, Birch Pollen Allergen Bet V 1	Betula pendula	0.412	32of81	1.8e-18	0.353	156	gi|38492423	GO!
39	gi|955264732|gid|21|Chain D, Crystal Structure Of Birch P	Betula pendula	0.412	43of81	7.6e-19	0.359	156	gi|955264732	GO!
40	gi|4006947|gid|21|pollen allergen Betv1, isoform at14 [Be	Betula pendula	0.412	27of81	4.9e-15	0.359	117	gi|4006947	GO!
41	gi|560188693|gid|21|Chain A, Crystal Structure Of A Varia	Betula pendula	0.412	32of81	9e-19	0.352	159	gi|560188693	GO!
42	gi|4006959|gid|21|pollen allergen Betv1, isoform at50 [Be	Betula pendula	0.412	30of81	9.1e-19	0.35	160	gi|4006959	GO!
43	gi|560188694|gid|21|Chain A, Crystal Structure Of An Unus	Betula pendula	0.412	32of81	1.3e-18	0.362	152	gi|560188694	GO!
44	gi|560188692|gid|21|Chain B, Crystal Structure Of A Dimer	Betula pendula	0.412	32of81	1.3e-18	0.362	152	gi|560188692	GO!
45	gi|4006957|gid|21|pollen allergen Betv1, isoform at45 [Be	Betula pendula	0.412	32of81	4.6e-19	0.35	160	gi|4006957	GO!
46	gi|1321720|gid|21|major allergen Bet v 1 [Betula pendula]	Betula pendula	0.412	32of81	9.1e-19	0.35	160	gi|1321720	GO!
47	gi|4376221|gid|21|pollen allergen, Betv1 [Betula pendula]	Betula pendula	0.412	30of81	9.7e-18	0.349	152	gi|4376221	GO!
48	gi|1542865|gid|21|pollen allergen Bet v 1 [Betula pendula	Betula pendula	0.412	50of81	8.5e-20	0.362	160	gi|1542865	GO!
49	gi|4590396|gid|21|isoallergen bet v 1 b3 [Betula pendula]	Betula pendula	0.412	31of81	4.6e-19	0.346	159	gi|4590396	GO!
50	gi|2564220|gid|21|pollen allergen Betv1 [Betula pendula]	Betula pendula	0.412	44of81	1.6e-20	0.362	160	gi|2564220	GO!
51	gi|565807648|gid|21|Chain A, Crystal Structure Of A Unusu	Betula pendula	0.412	32of81	1.3e-18	0.362	152	gi|565807648	GO!
52	gi|452740|gid|21|Bet v 1 j [Betula pendula]	Betula pendula	0.4	25of81	1.1e-18	0.34	159	gi|452740	GO!
53	gi|1321728|gid|21|major allergen Bet v 1 [Betula pendula]	Betula pendula	0.4	25of81	3.2e-17	0.333	159	gi|1321728	GO!
54	gi|12583685|gid|21|Bet vI jap3 [Betula platyphylla]	Betula platyphylla	0.4	35of81	1.7e-19	0.35	160	gi|12583685	GO!
55	gi|2564222|gid|21|pollen allergen Betv1 [Betula pendula]	Betula pendula	0.4	30of81	1.5e-18	0.344	160	gi|2564222	GO!
56	gi|212291474|gid|1245|Fag s 1 pollen allergen [Fagus sylv	Fagus sylvatica	0.4	15of81	3.1e-20	0.373	158	gi|212291474	GO!
57	gi|4590392|gid|21|isoallergen bet v 1 b1 [Betula pendula]	Betula pendula	0.4	40of81	4.3e-20	0.362	160	gi|4590392	GO!
58	gi|1321716|gid|21|major allergen Bet v 1 [Betula pendula]	Betula pendula	0.4	25of81	1.8e-18	0.34	159	gi|1321716	GO!
59	gi|4006955|gid|21|pollen allergen Betv1, isoform at42 [Be	Betula pendula	0.4	25of81	4.2e-18	0.331	160	gi|4006955	GO!
60	gi|450885|gid|21|Bet v 1b [Betula pendula]	Betula pendula	0.4	26of81	1.4e-17	0.331	160	gi|450885	GO!
61	gi|83722317|gid|21|major allergen Bet v 1.02C [Betula pen	Betula pendula	0.4	26of81	3.2e-16	0.336	146	gi|83722317	GO!
62	gi|4006928|gid|21|pollen allergen Betv1, isoform at8 [Bet	Betula pendula	0.4	35of81	7.1e-20	0.356	160	gi|4006928	GO!
63	gi|2414158|gid|21|major allergen Bet v 1 [Betula pendula]	Betula pendula	0.4	25of81	1.1e-18	0.34	159	gi|2414158	GO!
64	gi|452730|gid|21|Bet v 1 c [Betula pendula]	Betula pendula	0.4	26of81	1.4e-17	0.342	152	gi|452730	GO!
65	gi|4006963|gid|21|pollen allergen Betv1, isoform at87 [Be	Betula pendula	0.4	25of81	8.2e-15	0.35	117	gi|4006963	GO!
66	gi|550544347|gid|21|Chain A, Crystal Structure Of The Maj	Betula pendula	0.4	30of81	2.7e-17	0.349	152	gi|550544347	GO!
67	gi|212291470|gid|1245|Fag s 1 pollen allergen [Fagus sylv	Fagus sylvatica	0.4	15of81	3.6e-20	0.373	158	gi|212291470	GO!
68	gi|1168706|gid|21|Major pollen allergen Bet v 1-G (Bet v	Betula pendula	0.4	43of81	7.1e-20	0.368	152	gi|1168706	GO!
69	gi|1542861|gid|21|pollen allergen Bet v 1 [Betula pendula	Betula pendula	0.4	35of81	7.1e-20	0.356	160	gi|1542861	GO!
70	gi|11514622|gid|21|Chain A, Birch Pollen Allergen Bet V 1	Betula pendula	0.4	29of81	2.5e-18	0.346	156	gi|11514622	GO!
71	gi|212291472|gid|1245|Fag s 1 pollen allergen [Fagus sylv	Fagus sylvatica	0.4	10of81	5.1e-20	0.367	158	gi|212291472	GO!
72	gi|452734|gid|21|Bet v 1 e [Betula pendula]	Betula pendula	0.4	25of81	2.1e-18	0.34	159	gi|452734	GO!
73	gi|4006961|gid|21|pollen allergen Betv1, isoform at59 [Be	Betula pendula	0.4	47of81	2.8e-19	0.356	160	gi|4006961	GO!
74	gi|452742|gid|21|Bet v 1 k [Betula pendula]	Betula pendula	0.4	26of81	1.9e-17	0.342	152	gi|452742	GO!
75	gi|452736|gid|21|Bet v 1 f [Betula pendula]	Betula pendula	0.4	25of81	6.5e-19	0.348	158	gi|452736	GO!
76	gi|452744|gid|21|Bet v 1 l [Betula pendula]	Betula pendula	0.4	44of81	2.6e-20	0.356	160	gi|452744	GO!
77	gi|661918055|gid|21|Chain A, Crystal Structure Of Peroxin	Betula pendula	0.4	25of81	1.2e-16	0.342	152	gi|661918055	GO!
78	gi|1542871|gid|21|pollen allergen Bet v 1 [Betula pendula	Betula pendula	0.4	30of81	9.1e-19	0.344	160	gi|1542871	GO!
79	gi|1542863|gid|21|pollen allergen Bet v 1 [Betula pendula	Betula pendula	0.4	30of81	1.1e-18	0.344	160	gi|1542863	GO!
80	gi|748758670|gid|239|Pru p 1.0201 [Prunus persica]	Prunus persica	0.388	23of81	2.6e-20	0.352	159	gi|748758670	GO!
81	gi|402745|gid|410|Car b I [Carpinus betulus]	Carpinus betulus	0.388	21of81	8.2e-18	0.338	151	gi|402745	GO!
82	gi|1545893|gid|410|pollen allergen Car b 1 [Carpinus betu	Carpinus betulus	0.388	19of81	1.6e-17	0.327	159	gi|1545893	GO!
83	gi|402743|gid|410|Car b I, partial [Carpinus betulus]	Carpinus betulus	0.388	21of81	3e-18	0.336	152	gi|402743	GO!
84	gi|4376222|gid|21|pollen allergen, Betv1 [Betula pendula]	Betula pendula	0.388	17of81	1.6e-17	0.342	158	gi|4376222	GO!
85	gi|565380268|gid|2072|PR10 protein [Solanum lycopersicum]	Solanum lycopersicum (Lycopersicon esculentum)	0.388	42of81	1.2e-19	0.354	161	gi|565380268	GO!
86	gi|167472839|gid|410|pollen allergen Car b 1 isoform [Car	Carpinus betulus	0.388	21of81	4.2e-18	0.333	159	gi|167472839	GO!
87	gi|260600662|gid|540|Fra a 3 allergen [Fragaria x ananass	Fragaria x ananassa	0.388	30of81	2.3e-19	0.348	158	gi|260600662	GO!
88	gi|1545875|gid|410|pollen allergen Car b 1 [Carpinus betu	Carpinus betulus	0.388	21of81	3.8e-17	0.314	159	gi|1545875	GO!
89	gi|1545881|gid|410|pollen allergen Car b 1 [Carpinus betu	Carpinus betulus	0.388	21of81	2.5e-18	0.327	159	gi|1545881	GO!
90	gi|1545889|gid|410|pollen allergen Car b 1 [Carpinus betu	Carpinus betulus	0.388	21of81	3e-18	0.333	159	gi|1545889	GO!
91	gi|22690|gid|20|major allergen [Corylus avellana]	Corylus avellana	0.388	38of81	1.5e-18	0.348	158	gi|22690	GO!
92	gi|12583683|gid|21|Bet vI jap2 [Betula platyphylla]	Betula platyphylla	0.388	26of81	7.7e-19	0.344	160	gi|12583683	GO!
93	gi|167472841|gid|410|pollen allergen Car b 1 isoform [Car	Carpinus betulus	0.388	21of81	1.2e-17	0.321	159	gi|167472841	GO!
94	gi|4006967|gid|21|pollen allergen Betv1, isoform at7 [Bet	Betula pendula	0.388	31of81	3.3e-19	0.35	160	gi|4006967	GO!
95	gi|1545879|gid|410|pollen allergen Car b 1 [Carpinus betu	Carpinus betulus	0.388	21of81	1.9e-17	0.314	159	gi|1545879	GO!
96	gi|22684|gid|20|major allergen [Corylus avellana]	Corylus avellana	0.388	21of81	5.9e-18	0.34	159	gi|22684	GO!
97	gi|167472843|gid|410|pollen allergen Car b 1 isoform [Car	Carpinus betulus	0.388	21of81	5e-18	0.327	159	gi|167472843	GO!
98	gi|167472837|gid|410|pollen allergen Car b 1 isoform [Car	Carpinus betulus	0.388	21of81	2.5e-18	0.333	159	gi|167472837	GO!
99	gi|167472845|gid|410|pollen allergen Car b 1 isoform [Car	Carpinus betulus	0.388	21of81	2.1e-18	0.327	159	gi|167472845	GO!
100	gi|1104688661|gid|2595|pathogenesis related protein 10 [J	Juglans regia	0.3871	18of81	7.7e-19	0.342	158	gi|1104688661	GO!
101	gi|2677826|gid|239|major allergen protein homolog [Prunus	Prunus armeniaca	0.3754	19of81	1.3e-18	0.348	158	gi|2677826	GO!
102	gi|748758672|gid|239|Pru p 1.0301 [Prunus persica]	Prunus persica	0.3754	19of81	3.3e-19	0.342	158	gi|748758672	GO!
103	gi|110180525|gid|913|putative allergen Rub i 1 [Rubus ida	Rubus idaeus	0.3752	9of81	1.6e-14	0.326	135	gi|110180525	GO!
104	gi|534898|gid|21|1 Sc-3 [Betula pendula]	Betula pendula	0.375	11of81	7.1e-20	0.364	151	gi|534898	GO!
105	gi|44409474|gid|239|major cherry allergen Pru av 1.0202 [	Prunus avium	0.375	10of81	7.1e-20	0.34	159	gi|44409474	GO!
106	gi|1313968|gid|659|major allergen Mal d 1 [Malus x domest	Malus x domestica	0.375	13of81	1.4e-19	0.333	159	gi|1313968	GO!
107	gi|300872535|gid|1632|pollen allergen [Ostrya carpinifoli	Ostrya carpinifolia	0.375	11of81	5.9e-18	0.327	159	gi|300872535	GO!
108	gi|22686|gid|20|major allergen [Corylus avellana]	Corylus avellana	0.375	15of81	1.4e-17	0.342	158	gi|22686	GO!
109	gi|44409451|gid|239|major cherry allergen Pru av 1.0201 [	Prunus avium	0.375	13of81	2.3e-19	0.335	158	gi|44409451	GO!
110	gi|1545877|gid|410|pollen allergen Car b 1 [Carpinus betu	Carpinus betulus	0.375	16of81	4.5e-17	0.314	159	gi|1545877	GO!
111	gi|1313972|gid|659|major allergen Mal d1 [Malus x domesti	Malus x domestica	0.375	13of81	7.1e-20	0.333	159	gi|1313972	GO!
112	gi|1313970|gid|659|major allergen Mal d1 [Malus x domesti	Malus x domestica	0.375	13of81	2e-19	0.333	159	gi|1313970	GO!
113	gi|11762106|gid|20|major allergen variant Cor a 1.0404 [C	Corylus avellana	0.37	5of81	3.6e-18	0.338	160	gi|11762106	GO!
114	gi|1991455313|gid|20|Chain A, Major allergen Cor a 1.0401	Corylus avellana	0.37	5of81	3.5e-18	0.342	152	gi|1991455313	GO!
115	gi|394986655|gid|3349|Betv1-like protein [Cannabis sativa	Cannabis sativa	0.3628	4of81	1.2e-17	0.321	159	gi|394986655	GO!
116	gi|1008580|gid|410|group 2 Car b 1=isoallergenic variant	Carpinus betulus	0.3627	9of81	1.1e-09	0.397	73	gi|1008580	GO!
117	gi|54311119|gid|1762|18 kD winter accumulating protein C	Morus bombycis	0.3624	19of81	3.5e-20	0.368	152	gi|54311119	GO!
118	gi|1513216|gid|239|cherry-allergen PRUA1	Prunus avium	0.362	1of81	8.3e-18	0.316	158	gi|1513216	GO!
119	gi|44409496|gid|239|major cherry allergen Pru av 1.0203 [	Prunus avium	0.362	5of81	1.7e-19	0.333	159	gi|44409496	GO!
120	gi|82492265|gid|239|major allergen Pru p 1 [Prunus persic	Prunus persica	0.362	1of81	1.9e-17	0.316	158	gi|82492265	GO!
121	gi|190613871|gid|1884|putative allergen Pru du 1.01 [Prun	Prunus dulcis x Prunus persica	0.362	1of81	2.7e-17	0.316	158	gi|190613871	GO!
122	gi|11762104|gid|20|major allergen variant Cor a 1.0403 [C	Corylus avellana	0.358	4of81	2.3e-17	0.329	152	gi|11762104	GO!
123	gi|1991455314|gid|20|Chain A, Major allergen variant Cor	Corylus avellana	0.358	4of81	1.6e-17	0.327	156	gi|1991455314	GO!
124	gi|4590380|gid|659|major allergen mal d 1 [Malus x domest	Malus x domestica	0.35	3of81	1e-16	0.316	158	gi|4590380	GO!
125	gi|4590364|gid|659|major allergen mal d 1 [Malus x domest	Malus x domestica	0.35	3of81	7.5e-17	0.316	158	gi|4590364	GO!
126	gi|747852|gid|659|Mal d 1 [Malus domestica]	Malus x domestica	0.35	3of81	1.2e-16	0.316	158	gi|747852	GO!
127	gi|4768879|gid|659|major allergen Mal d 1 [Malus x domest	Malus x domestica	0.35	3of81	1e-16	0.316	158	gi|4768879	GO!
128	gi|15418744|gid|659|ribonuclease-like PR-10a [Malus domes	Malus x domestica	0.35	3of81	5.3e-17	0.329	158	gi|15418744	GO!
129	gi|862307|gid|659|Ap15 [Malus x domestica]	Malus x domestica	0.35	3of81	2.7e-17	0.329	158	gi|862307	GO!
130	gi|4590382|gid|659|major allergen mal d 1 [Malus x domest	Malus x domestica	0.35	3of81	2.4e-16	0.31	158	gi|4590382	GO!
131	gi|4590388|gid|659|major allergen mal d 1 [Malus x domest	Malus x domestica	0.35	3of81	1.4e-17	0.329	158	gi|4590388	GO!
132	gi|21685277|gid|659|major allergen d 1 [Malus x domestica	Malus x domestica	0.35	3of81	8.8e-17	0.329	158	gi|21685277	GO!
133	gi|886683|gid|659|major allergen [Malus x domestica]	Malus x domestica	0.35	3of81	2.9e-16	0.316	158	gi|886683	GO!
134	gi|4590366|gid|659|major allergen mal d 1 [Malus x domest	Malus x domestica	0.35	3of81	7.5e-17	0.323	158	gi|4590366	GO!
135	gi|15418742|gid|659|ribonuclease-like PR-10c [Malus domes	Malus x domestica	0.35	3of81	2.4e-16	0.311	151	gi|15418742	GO!
136	gi|4590368|gid|659|major allergen mal d 1 [Malus x domest	Malus x domestica	0.35	3of81	2.3e-17	0.329	158	gi|4590368	GO!
137	gi|4590378|gid|659|major allergen mal d 1 [Malus x domest	Malus x domestica	0.35	3of81	2.1e-16	0.311	151	gi|4590378	GO!

## Sheet: Table S2
Table S2. Epitope analysis of (A) Bet v 1, (B) MaPR10-BeB5, and (C) MaPR10-GNA5 using BepiPred-2.0.
(A) Bet v 1
Entry	Position	AminoAcid	Exposed/Buried	RelativeSurfaceAccessilibity	HelixProbability	SheetProbability	CoilProbability	EpitopeProbability
Major	1	M	E	0.57	0.003	0.003	0.994	0.255
Major	2	G	E	0.396	0.004	0.514	0.481	0.316
Major	3	V	B	0.328	0.002	0.816	0.182	0.372667
Major	4	F	B	0.261	0.001	0.959	0.04	0.43
Major	5	N	E	0.403	0.001	0.959	0.04	0.480889
Major	6	Y	B	0.188	0.001	0.959	0.04	0.498778
Major	7	E	E	0.403	0.001	0.959	0.04	0.500111
Major	8	T	B	0.27	0.001	0.9	0.099	0.491667
Major	9	E	E	0.433	0.001	0.959	0.04	0.489333
Major	10	T	B	0.222	0.001	0.9	0.099	0.470778
Major	11	T	E	0.581	0.001	0.9	0.099	0.465111
Major	12	S	B	0.075	0.003	0.718	0.279	0.428889
Major	13	V	E	0.619	0.005	0.336	0.66	0.423111
Major	14	I	B	0.048	0.018	0.088	0.893	0.427444
Major	15	P	E	0.317	0.115	0.016	0.868	0.410222
Major	16	A	B	0.031	0.923	0.002	0.076	0.403111
Major	17	A	E	0.541	0.923	0.002	0.076	0.386444
Major	18	R	E	0.378	0.938	0.007	0.055	0.378667
Major	19	L	B	0.038	0.975	0.003	0.022	0.366
Major	20	F	B	0.061	0.975	0.003	0.022	0.358333
Major	21	K	E	0.425	0.975	0.003	0.022	0.395
Major	22	A	B	0.078	0.938	0.007	0.055	0.407111
Major	23	F	B	0.046	0.938	0.007	0.055	0.401667
Major	24	I	B	0.138	0.802	0.014	0.185	0.434667
Major	25	L	E	0.462	0.622	0.015	0.363	0.448778
Major	26	D	E	0.448	0.257	0.016	0.727	0.473444
Major	27	G	B	0.107	0.109	0.005	0.886	0.465111
Major	28	D	E	0.501	0.053	0.005	0.942	0.488667
Major	29	N	E	0.46	0.257	0.016	0.727	0.5
Major	30	L	B	0.104	0.43	0.016	0.555	0.484222
Major	31	F	B	0.072	0.339	0.016	0.645	0.467667
Major	32	P	B	0.156	0.522	0.016	0.462	0.482778
Major	33	K	E	0.454	0.522	0.016	0.462	0.475556
Major	34	V	B	0.086	0.522	0.016	0.462	0.461778
Major	35	A	B	0.107	0.257	0.016	0.727	0.455222
Major	36	P	E	0.32	0.181	0.016	0.803	0.484667
Major	37	Q	E	0.596	0.113	0.043	0.844	0.479556
Major	38	A	B	0.203	0.056	0.142	0.802	0.469
Major	39	I	B	0.055	0.022	0.359	0.619	0.497667
Major	40	S	E	0.445	0.004	0.616	0.381	0.521222
Major	41	S	E	0.387	0.003	0.718	0.279	0.535222
Major	42	V	B	0.091	0.001	0.9	0.099	0.561
Major	43	E	E	0.377	0.001	0.959	0.04	0.596111
Major	44	N	B	0.235	0.001	0.959	0.04	0.640556
Major	45	I	E	0.249	0.001	0.959	0.04	0.669222
Major	46	E	E	0.495	0.002	0.816	0.182	0.710556
Major	47	G	E	0.374	0.004	0.42	0.576	0.753889
Major	48	N	E	0.552	0.004	0.138	0.858	0.770111
Major	49	G	E	0.482	0.005	0.045	0.951	0.784667
Major	50	G	E	0.443	0.004	0.085	0.91	0.785333
Major	51	P	E	0.387	0.004	0.197	0.799	0.751222
Major	52	G	B	0.065	0.005	0.336	0.66	0.716
Major	53	T	B	0.058	0.002	0.816	0.182	0.667222
Major	54	I	B	0.04	0.001	0.959	0.04	0.630889
Major	55	K	B	0.173	0.001	0.959	0.04	0.576333
Major	56	K	B	0.17	0.001	0.959	0.04	0.537444
Major	57	I	B	0.039	0.001	0.959	0.04	0.516778
Major	58	S	E	0.241	0.001	0.959	0.04	0.489222
Major	59	F	B	0.067	0.002	0.816	0.182	0.477667
Major	60	P	B	0.201	0.004	0.42	0.576	0.489111
Major	61	E	E	0.533	0.004	0.138	0.858	0.495667
Major	62	G	E	0.662	0.005	0.015	0.979	0.517
Major	63	F	E	0.321	0.018	0.019	0.964	0.520778
Major	64	P	E	0.581	0.018	0.088	0.893	0.526556
Major	65	F	B	0.289	0.02	0.205	0.775	0.528556
Major	66	K	E	0.403	0.021	0.451	0.528	0.518556
Major	67	Y	E	0.282	0.021	0.756	0.223	0.551333
Major	68	V	B	0.084	0.018	0.846	0.136	0.536333
Major	69	K	E	0.245	0.018	0.846	0.136	0.556889
Major	70	D	B	0.146	0.018	0.846	0.136	0.563667
Major	71	R	E	0.296	0.011	0.918	0.071	0.554778
Major	72	V	B	0.067	0.018	0.846	0.136	0.549333
Major	73	D	E	0.295	0.018	0.846	0.136	0.600556
Major	74	E	E	0.298	0.011	0.918	0.071	0.604667
Major	75	V	B	0.143	0.018	0.846	0.136	0.602444
Major	76	D	B	0.157	0.023	0.655	0.322	0.571333
Major	77	H	E	0.622	0.056	0.142	0.802	0.581889
Major	78	T	E	0.682	0.018	0.088	0.893	0.548556
Major	79	N	E	0.557	0.004	0.138	0.858	0.537
Major	80	F	B	0.227	0.004	0.514	0.481	0.532444
Major	81	K	B	0.251	0.001	0.9	0.099	0.498889
Major	82	Y	B	0.112	0.001	0.959	0.04	0.443111
Major	83	N	E	0.3	0.001	0.959	0.04	0.425444
Major	84	Y	B	0.066	0.001	0.959	0.04	0.457667
Major	85	S	B	0.208	0.001	0.959	0.04	0.407111
Major	86	V	B	0.078	0.001	0.959	0.04	0.404444
Major	87	I	B	0.086	0.001	0.9	0.099	0.378667
Major	88	E	B	0.184	0.004	0.616	0.381	0.397556
Major	89	G	B	0.158	0.021	0.279	0.699	0.369111
Major	90	G	E	0.4	0.019	0.141	0.84	0.409222
Major	91	P	E	0.358	0.02	0.205	0.775	0.433444
Major	92	I	E	0.291	0.019	0.141	0.84	0.439889
Major	93	G	E	0.415	0.018	0.047	0.935	0.412667
Major	94	D	E	0.615	0.018	0.088	0.893	0.490778
Major	95	T	E	0.443	0.005	0.262	0.733	0.473667
Major	96	L	B	0.058	0.003	0.718	0.279	0.501889
Major	97	E	E	0.348	0.001	0.9	0.099	0.480889
Major	98	K	B	0.247	0.001	0.959	0.04	0.508778
Major	99	I	B	0.066	0.001	0.959	0.04	0.493444
Major	100	S	B	0.245	0.001	0.959	0.04	0.487111
Major	101	N	B	0.141	0.001	0.959	0.04	0.476444
Major	102	E	E	0.286	0.001	0.959	0.04	0.475556
Major	103	I	B	0.072	0.001	0.959	0.04	0.443444
Major	104	K	E	0.397	0.001	0.959	0.04	0.425222
Major	105	I	B	0.105	0.001	0.959	0.04	0.435111
Major	106	V	E	0.273	0.001	0.9	0.099	0.445667
Major	107	A	E	0.377	0.003	0.718	0.279	0.453778
Major	108	T	E	0.384	0.005	0.262	0.733	0.463556
Major	109	P	E	0.614	0.005	0.045	0.951	0.459222
Major	110	D	E	0.772	0.005	0.015	0.979	0.472111
Major	111	G	E	0.62	0.005	0.015	0.979	0.447889
Major	112	G	B	0.203	0.005	0.262	0.733	0.412111
Major	113	S	B	0.081	0.002	0.816	0.182	0.422222
Major	114	I	B	0.08	0.001	0.959	0.04	0.410111
Major	115	L	B	0.028	0.001	0.959	0.04	0.395222
Major	116	K	B	0.155	0.001	0.959	0.04	0.387778
Major	117	I	B	0.047	0.001	0.959	0.04	0.355889
Major	118	S	B	0.104	0.001	0.9	0.099	0.327778
Major	119	N	B	0.051	0.001	0.959	0.04	0.335889
Major	120	K	E	0.263	0.006	0.962	0.032	0.366778
Major	121	Y	B	0.06	0.011	0.918	0.071	0.406778
Major	122	H	B	0.222	0.001	0.9	0.099	0.434556
Major	123	T	E	0.27	0.021	0.756	0.223	0.406889
Major	124	K	E	0.422	0.02	0.205	0.775	0.432222
Major	125	G	E	0.643	0.018	0.019	0.964	0.441333
Major	126	D	E	0.735	0.018	0.019	0.964	0.443889
Major	127	H	E	0.471	0.005	0.015	0.979	0.449889
Major	128	E	E	0.696	0.018	0.019	0.964	0.451556
Major	129	V	B	0.208	0.018	0.019	0.964	0.453667
Major	130	K	E	0.425	0.053	0.005	0.942	0.436222
Major	131	A	E	0.623	0.782	0.003	0.216	0.404111
Major	132	E	E	0.659	0.858	0.002	0.139	0.429444
Major	133	Q	E	0.291	0.858	0.002	0.139	0.401333
Major	134	V	B	0.056	0.858	0.002	0.139	0.391111
Major	135	K	E	0.455	0.858	0.002	0.139	0.430333
Major	136	A	E	0.334	0.923	0.002	0.076	0.459444
Major	137	S	B	0.06	0.97	0.001	0.03	0.438111
Major	138	K	B	0.172	0.97	0.001	0.03	0.415444
Major	139	E	E	0.424	0.988	0	0.012	0.427778
Major	140	M	B	0.146	0.988	0	0.012	0.434778
Major	141	G	B	0.035	0.988	0	0.012	0.409111
Major	142	E	B	0.111	0.97	0.001	0.03	0.424778
Major	143	T	B	0.256	0.97	0.001	0.03	0.422
Major	144	L	B	0.047	0.97	0.001	0.03	0.377333
Major	145	L	B	0.038	0.988	0	0.012	0.370556
Major	146	R	E	0.28	0.988	0	0.012	0.383667
Major	147	A	B	0.137	0.988	0	0.012	0.367778
Major	148	V	B	0.021	0.97	0.001	0.03	0.342444
Major	149	E	B	0.111	0.97	0.001	0.03	0.359778
Major	150	S	E	0.401	0.97	0.001	0.03	0.389
Major	151	Y	B	0.124	0.923	0.002	0.076	0.391556
Major	152	L	B	0.047	0.923	0.002	0.076	0.414222
Major	153	L	E	0.282	0.782	0.003	0.216	0.458778
Major	154	A	E	0.428	0.502	0.002	0.495	0.464333
Major	155	H	B	0.288	0.053	0.005	0.942	0.475444
Major	156	S	E	0.366	0.053	0.005	0.942	0.498667
Major	157	D	E	0.701	0.115	0.016	0.868	0.470111
Major	158	A	E	0.399	0.115	0.016	0.868	0.414444
Major	159	Y	E	0.328	0.115	0.016	0.868	0.360333
Major	160	N	E	0.844	0.003	0.003	0.994	0.300222
(B) MaPR10-BeB5
Entry	Position	AminoAcid	Exposed/Buried	RelativeSurfaceAccessilibity	HelixProbability	SheetProbability	CoilProbability	EpitopeProbability
MaPR10	1	M	E	0.593	0.003	0.003	0.994	0.255444
MaPR10	2	A	E	0.426	0.004	0.42	0.576	0.307667
MaPR10	3	S	E	0.39	0.002	0.816	0.182	0.352444
MaPR10	4	G	E	0.344	0.001	0.959	0.04	0.411111
MaPR10	5	S	E	0.418	0.001	0.959	0.04	0.461778
MaPR10	6	W	B	0.191	0.001	0.959	0.04	0.483667
MaPR10	7	T	E	0.428	0.001	0.959	0.04	0.496556
MaPR10	8	L	E	0.338	0.001	0.959	0.04	0.482667
MaPR10	9	E	E	0.428	0.001	0.959	0.04	0.476444
MaPR10	10	I	B	0.209	0.001	0.959	0.04	0.461222
MaPR10	11	E	E	0.597	0.001	0.9	0.099	0.466556
MaPR10	12	S	B	0.073	0.003	0.718	0.279	0.460111
MaPR10	13	S	E	0.623	0.005	0.336	0.66	0.459889
MaPR10	14	V	B	0.065	0.018	0.088	0.893	0.469111
MaPR10	15	E	E	0.356	0.115	0.016	0.868	0.457111
MaPR10	16	A	B	0.047	0.923	0.002	0.076	0.439889
MaPR10	17	S	E	0.581	0.923	0.002	0.076	0.44
MaPR10	18	R	E	0.393	0.923	0.002	0.076	0.434556
MaPR10	19	L	B	0.055	0.975	0.003	0.022	0.431222
MaPR10	20	F	B	0.073	0.975	0.003	0.022	0.420667
MaPR10	21	R	E	0.467	0.975	0.003	0.022	0.442778
MaPR10	22	A	B	0.125	0.938	0.007	0.055	0.447889
MaPR10	23	A	B	0.059	0.938	0.007	0.055	0.443
MaPR10	24	A	B	0.105	0.802	0.014	0.185	0.470222
MaPR10	25	L	E	0.442	0.522	0.016	0.462	0.495222
MaPR10	26	D	E	0.468	0.339	0.016	0.645	0.501
MaPR10	27	W	B	0.114	0.176	0.004	0.82	0.503444
MaPR10	28	H	E	0.424	0.109	0.005	0.886	0.525444
MaPR10	29	S	E	0.54	0.257	0.016	0.727	0.546778
MaPR10	30	L	B	0.131	0.354	0.048	0.598	0.538333
MaPR10	31	A	B	0.115	0.181	0.016	0.803	0.526556
MaPR10	32	P	B	0.219	0.257	0.016	0.727	0.529444
MaPR10	33	K	E	0.555	0.43	0.016	0.555	0.524889
MaPR10	34	V	B	0.154	0.339	0.016	0.645	0.515889
MaPR10	35	V	B	0.147	0.181	0.016	0.803	0.510889
MaPR10	36	P	E	0.404	0.181	0.016	0.803	0.519556
MaPR10	37	E	E	0.626	0.113	0.043	0.844	0.514222
MaPR10	38	I	B	0.212	0.056	0.142	0.802	0.490444
MaPR10	39	V	B	0.058	0.022	0.359	0.619	0.490667
MaPR10	40	V	E	0.469	0.004	0.616	0.381	0.489444
MaPR10	41	S	E	0.455	0.003	0.718	0.279	0.491556
MaPR10	42	G	B	0.086	0.001	0.9	0.099	0.493111
MaPR10	43	A	E	0.418	0.001	0.959	0.04	0.498778
MaPR10	44	V	B	0.294	0.001	0.959	0.04	0.518333
MaPR10	45	L	E	0.264	0.001	0.9	0.099	0.534556
MaPR10	46	E	E	0.566	0.003	0.718	0.279	0.552556
MaPR10	47	G	E	0.374	0.005	0.336	0.66	0.568222
MaPR10	48	D	E	0.663	0.004	0.085	0.91	0.575111
MaPR10	49	G	E	0.502	0.005	0.045	0.951	0.585889
MaPR10	50	S	E	0.573	0.005	0.045	0.951	0.571
MaPR10	51	V	E	0.427	0.004	0.138	0.858	0.563333
MaPR10	52	G	B	0.175	0.005	0.262	0.733	0.553556
MaPR10	53	S	B	0.116	0.003	0.718	0.279	0.522333
MaPR10	54	V	B	0.075	0.001	0.959	0.04	0.502778
MaPR10	55	R	B	0.208	0.001	0.959	0.04	0.458
MaPR10	56	Q	E	0.281	0.001	0.959	0.04	0.447444
MaPR10	57	L	B	0.04	0.001	0.959	0.04	0.462
MaPR10	58	N	E	0.317	0.001	0.959	0.04	0.460778
MaPR10	59	F	B	0.074	0.002	0.816	0.182	0.481667
MaPR10	60	S	E	0.247	0.004	0.514	0.481	0.482778
MaPR10	61	P	E	0.515	0.004	0.197	0.799	0.488333
MaPR10	62	A	E	0.625	0.005	0.045	0.951	0.506889
MaPR10	63	L	E	0.303	0.018	0.047	0.935	0.505
MaPR10	64	P	E	0.574	0.018	0.088	0.893	0.522111
MaPR10	65	F	B	0.272	0.02	0.205	0.775	0.532
MaPR10	66	G	E	0.423	0.022	0.552	0.426	0.512778
MaPR10	67	Y	E	0.292	0.021	0.756	0.223	0.523889
MaPR10	68	V	B	0.09	0.018	0.846	0.136	0.511778
MaPR10	69	K	E	0.25	0.018	0.846	0.136	0.519444
MaPR10	70	E	B	0.165	0.011	0.918	0.071	0.513222
MaPR10	71	R	E	0.295	0.011	0.918	0.071	0.515
MaPR10	72	L	B	0.072	0.018	0.846	0.136	0.512222
MaPR10	73	D	E	0.323	0.011	0.918	0.071	0.531444
MaPR10	74	F	E	0.321	0.011	0.918	0.071	0.529778
MaPR10	75	V	B	0.152	0.018	0.846	0.136	0.537444
MaPR10	76	D	B	0.171	0.022	0.552	0.426	0.527778
MaPR10	77	V	E	0.634	0.056	0.142	0.802	0.534889
MaPR10	78	D	E	0.738	0.018	0.047	0.935	0.519667
MaPR10	79	K	E	0.572	0.004	0.085	0.91	0.517889
MaPR10	80	F	B	0.23	0.004	0.514	0.481	0.505667
MaPR10	81	E	E	0.302	0.001	0.9	0.099	0.503778
MaPR10	82	C	B	0.13	0.001	0.959	0.04	0.478556
MaPR10	83	K	E	0.345	0.001	0.959	0.04	0.465889
MaPR10	84	Q	B	0.082	0.001	0.959	0.04	0.472333
MaPR10	85	T	B	0.24	0.001	0.959	0.04	0.450889
MaPR10	86	L	B	0.099	0.001	0.959	0.04	0.448111
MaPR10	87	F	B	0.109	0.001	0.9	0.099	0.459444
MaPR10	88	E	B	0.251	0.004	0.616	0.381	0.485778
MaPR10	89	G	B	0.206	0.02	0.205	0.775	0.487444
MaPR10	90	G	E	0.484	0.019	0.141	0.84	0.497889
MaPR10	91	H	E	0.367	0.02	0.205	0.775	0.521778
MaPR10	92	I	E	0.306	0.019	0.141	0.84	0.518556
MaPR10	93	G	E	0.436	0.018	0.047	0.935	0.510889
MaPR10	94	T	E	0.658	0.005	0.045	0.951	0.520333
MaPR10	95	K	E	0.475	0.005	0.262	0.733	0.505333
MaPR10	96	L	B	0.062	0.003	0.718	0.279	0.495889
MaPR10	97	E	E	0.377	0.001	0.9	0.099	0.471333
MaPR10	98	I	B	0.246	0.001	0.959	0.04	0.475556
MaPR10	99	A	B	0.082	0.001	0.959	0.04	0.466778
MaPR10	100	T	B	0.267	0.001	0.959	0.04	0.459778
MaPR10	101	S	B	0.165	0.001	0.959	0.04	0.458778
MaPR10	102	H	E	0.293	0.001	0.959	0.04	0.452667
MaPR10	103	F	B	0.105	0.001	0.959	0.04	0.463889
MaPR10	104	K	E	0.426	0.001	0.959	0.04	0.474889
MaPR10	105	F	B	0.1	0.001	0.959	0.04	0.482222
MaPR10	106	E	E	0.332	0.001	0.9	0.099	0.487667
MaPR10	107	P	E	0.369	0.002	0.816	0.182	0.493333
MaPR10	108	A	E	0.477	0.005	0.262	0.733	0.501
MaPR10	109	S	E	0.666	0.005	0.045	0.951	0.494667
MaPR10	110	G	E	0.762	0.003	0.003	0.994	0.505778
MaPR10	111	G	E	0.647	0.005	0.015	0.979	0.487556
MaPR10	112	G	B	0.215	0.005	0.336	0.66	0.467
MaPR10	113	C	B	0.086	0.002	0.816	0.182	0.445556
MaPR10	114	V	B	0.112	0.001	0.959	0.04	0.437889
MaPR10	115	L	B	0.038	0.001	0.959	0.04	0.430111
MaPR10	116	K	B	0.223	0.001	0.959	0.04	0.419222
MaPR10	117	V	B	0.085	0.001	0.959	0.04	0.413444
MaPR10	118	V	B	0.151	0.001	0.9	0.099	0.416222
MaPR10	119	T	B	0.088	0.001	0.959	0.04	0.428
MaPR10	120	T	E	0.36	0.001	0.959	0.04	0.455111
MaPR10	121	Y	B	0.093	0.011	0.918	0.071	0.478333
MaPR10	122	K	E	0.278	0.011	0.918	0.071	0.506667
MaPR10	123	L	E	0.298	0.021	0.756	0.223	0.514778
MaPR10	124	L	E	0.423	0.019	0.141	0.84	0.527111
MaPR10	125	P	E	0.653	0.018	0.019	0.964	0.538333
MaPR10	126	G	E	0.786	0.018	0.019	0.964	0.539333
MaPR10	127	V	E	0.357	0.018	0.019	0.964	0.547667
MaPR10	128	E	E	0.731	0.018	0.047	0.935	0.542667
MaPR10	129	D	E	0.257	0.018	0.019	0.964	0.548889
MaPR10	130	D	E	0.477	0.016	0.005	0.979	0.53
MaPR10	131	Q	E	0.535	0.321	0.003	0.675	0.534444
MaPR10	132	S	E	0.749	0.6	0.003	0.397	0.520444
MaPR10	133	E	E	0.312	0.694	0.003	0.303	0.504444
MaPR10	134	I	B	0.073	0.782	0.003	0.216	0.503333
MaPR10	135	V	E	0.499	0.802	0.014	0.185	0.512889
MaPR10	136	G	E	0.426	0.858	0.002	0.139	0.505556
MaPR10	137	S	B	0.052	0.97	0.001	0.03	0.483778
MaPR10	138	K	B	0.189	0.97	0.001	0.03	0.462556
MaPR10	139	E	E	0.516	0.988	0	0.012	0.466222
MaPR10	140	T	B	0.181	0.988	0	0.012	0.434556
MaPR10	141	V	B	0.026	0.988	0	0.012	0.413889
MaPR10	142	T	B	0.146	0.988	0	0.012	0.427889
MaPR10	143	G	E	0.345	0.97	0.001	0.03	0.418778
MaPR10	144	I	B	0.046	0.97	0.001	0.03	0.381222
MaPR10	145	I	B	0.041	0.988	0	0.012	0.374667
MaPR10	146	K	E	0.313	0.988	0	0.012	0.390111
MaPR10	147	A	B	0.189	0.988	0	0.012	0.384333
MaPR10	148	A	B	0.026	0.988	0	0.012	0.362889
MaPR10	149	E	B	0.151	0.97	0.001	0.03	0.387222
MaPR10	150	A	E	0.467	0.97	0.001	0.03	0.410667
MaPR10	151	Y	B	0.157	0.97	0.001	0.03	0.411111
MaPR10	152	L	B	0.056	0.923	0.002	0.076	0.431444
MaPR10	153	V	E	0.292	0.782	0.003	0.216	0.467667
MaPR10	154	A	E	0.486	0.502	0.002	0.495	0.475444
MaPR10	155	N	E	0.285	0.053	0.005	0.942	0.479
MaPR10	156	P	E	0.403	0.176	0.004	0.82	0.485333
MaPR10	157	A	E	0.705	0.257	0.016	0.727	0.458556
MaPR10	158	A	E	0.318	0.257	0.016	0.727	0.400333
MaPR10	159	Y	E	0.304	0.257	0.016	0.727	0.349667
MaPR10	160	A	E	0.728	0.016	0.005	0.979	0.29
(C) MaPR10-GNA5
Entry	Position	AminoAcid	Exposed/Buried	RelativeSurfaceAccessilibity	HelixProbability	SheetProbability	CoilProbability	EpitopeProbability
MAPR10	1	M	E	0.588	0.003	0.003	0.994	0.257444
MAPR10	2	A	E	0.424	0.004	0.42	0.576	0.310889
MAPR10	3	S	E	0.363	0.002	0.816	0.182	0.354333
MAPR10	4	G	B	0.33	0.001	0.959	0.04	0.412667
MAPR10	5	S	E	0.402	0.001	0.959	0.04	0.463333
MAPR10	6	W	B	0.188	0.001	0.959	0.04	0.486444
MAPR10	7	T	E	0.439	0.001	0.959	0.04	0.499111
MAPR10	8	L	E	0.302	0.001	0.959	0.04	0.484556
MAPR10	9	E	E	0.442	0.001	0.959	0.04	0.477778
MAPR10	10	I	B	0.227	0.001	0.959	0.04	0.462222
MAPR10	11	E	E	0.601	0.001	0.9	0.099	0.466222
MAPR10	12	S	B	0.074	0.003	0.718	0.279	0.460111
MAPR10	13	S	E	0.631	0.005	0.336	0.66	0.459222
MAPR10	14	V	B	0.066	0.018	0.088	0.893	0.469222
MAPR10	15	E	E	0.364	0.115	0.016	0.868	0.456222
MAPR10	16	A	B	0.043	0.923	0.002	0.076	0.439111
MAPR10	17	S	E	0.611	0.923	0.002	0.076	0.439444
MAPR10	18	R	E	0.422	0.923	0.002	0.076	0.431778
MAPR10	19	L	B	0.054	0.975	0.003	0.022	0.428667
MAPR10	20	F	B	0.066	0.975	0.003	0.022	0.418778
MAPR10	21	R	E	0.459	0.975	0.003	0.022	0.442889
MAPR10	22	A	B	0.13	0.938	0.007	0.055	0.449556
MAPR10	23	A	B	0.06	0.938	0.007	0.055	0.446667
MAPR10	24	A	B	0.117	0.802	0.014	0.185	0.476444
MAPR10	25	L	E	0.425	0.522	0.016	0.462	0.503
MAPR10	26	D	E	0.499	0.339	0.016	0.645	0.512
MAPR10	27	W	B	0.142	0.115	0.016	0.868	0.518556
MAPR10	28	H	E	0.397	0.115	0.016	0.868	0.536889
MAPR10	29	S	E	0.554	0.184	0.043	0.773	0.555889
MAPR10	30	L	B	0.147	0.268	0.043	0.689	0.546444
MAPR10	31	A	B	0.157	0.115	0.016	0.868	0.533333
MAPR10	32	P	B	0.194	0.257	0.016	0.727	0.535778
MAPR10	33	K	E	0.535	0.354	0.048	0.598	0.529556
MAPR10	34	V	B	0.148	0.354	0.048	0.598	0.519667
MAPR10	35	V	B	0.144	0.181	0.016	0.803	0.512556
MAPR10	36	P	E	0.379	0.257	0.016	0.727	0.518889
MAPR10	37	E	E	0.628	0.184	0.043	0.773	0.516556
MAPR10	38	I	B	0.224	0.113	0.087	0.8	0.495222
MAPR10	39	V	B	0.06	0.069	0.386	0.545	0.495444
MAPR10	40	V	E	0.492	0.022	0.552	0.426	0.496222
MAPR10	41	S	E	0.429	0.003	0.718	0.279	0.495889
MAPR10	42	G	B	0.092	0.001	0.9	0.099	0.497444
MAPR10	43	A	E	0.427	0.001	0.959	0.04	0.501222
MAPR10	44	V	B	0.298	0.001	0.959	0.04	0.522889
MAPR10	45	L	B	0.249	0.001	0.9	0.099	0.541222
MAPR10	46	E	E	0.585	0.003	0.718	0.279	0.563556
MAPR10	47	G	E	0.35	0.005	0.336	0.66	0.582333
MAPR10	48	D	E	0.613	0.004	0.138	0.858	0.591444
MAPR10	49	G	E	0.49	0.005	0.045	0.951	0.599778
MAPR10	50	S	E	0.539	0.005	0.045	0.951	0.584889
MAPR10	51	V	E	0.457	0.004	0.085	0.91	0.577667
MAPR10	52	G	B	0.157	0.004	0.197	0.799	0.566333
MAPR10	53	S	B	0.106	0.003	0.718	0.279	0.525556
MAPR10	54	V	B	0.064	0.001	0.959	0.04	0.498667
MAPR10	55	R	B	0.199	0.001	0.959	0.04	0.449889
MAPR10	56	Q	E	0.255	0.001	0.959	0.04	0.436889
MAPR10	57	L	B	0.038	0.001	0.959	0.04	0.448111
MAPR10	58	N	E	0.309	0.001	0.959	0.04	0.447667
MAPR10	59	L	B	0.076	0.001	0.9	0.099	0.466889
MAPR10	60	S	E	0.24	0.004	0.514	0.481	0.467667
MAPR10	61	P	E	0.57	0.004	0.197	0.799	0.475889
MAPR10	62	A	E	0.646	0.005	0.045	0.951	0.502222
MAPR10	63	L	E	0.309	0.018	0.047	0.935	0.506222
MAPR10	64	P	E	0.574	0.018	0.088	0.893	0.523667
MAPR10	65	F	E	0.286	0.02	0.205	0.775	0.532
MAPR10	66	G	E	0.398	0.022	0.552	0.426	0.513667
MAPR10	67	Y	E	0.291	0.021	0.756	0.223	0.526111
MAPR10	68	V	B	0.094	0.018	0.846	0.136	0.516
MAPR10	69	K	E	0.254	0.018	0.846	0.136	0.522111
MAPR10	70	E	B	0.16	0.011	0.918	0.071	0.516556
MAPR10	71	R	E	0.295	0.011	0.918	0.071	0.517444
MAPR10	72	L	B	0.064	0.018	0.846	0.136	0.514
MAPR10	73	D	E	0.294	0.011	0.918	0.071	0.532778
MAPR10	74	F	E	0.329	0.011	0.918	0.071	0.530556
MAPR10	75	V	B	0.155	0.018	0.846	0.136	0.538778
MAPR10	76	D	B	0.169	0.022	0.552	0.426	0.527444
MAPR10	77	V	E	0.642	0.056	0.142	0.802	0.533444
MAPR10	78	D	E	0.733	0.018	0.088	0.893	0.518
MAPR10	79	K	E	0.569	0.004	0.085	0.91	0.516556
MAPR10	80	F	B	0.231	0.004	0.514	0.481	0.503333
MAPR10	81	E	E	0.282	0.001	0.9	0.099	0.503444
MAPR10	82	C	B	0.122	0.001	0.959	0.04	0.481
MAPR10	83	K	E	0.332	0.001	0.959	0.04	0.469444
MAPR10	84	Q	B	0.08	0.001	0.959	0.04	0.475889
MAPR10	85	T	B	0.236	0.001	0.959	0.04	0.455667
MAPR10	86	L	B	0.107	0.001	0.959	0.04	0.452333
MAPR10	87	F	B	0.109	0.001	0.9	0.099	0.463
MAPR10	88	E	B	0.249	0.004	0.616	0.381	0.488222
MAPR10	89	G	B	0.205	0.02	0.205	0.775	0.488889
MAPR10	90	G	E	0.483	0.019	0.141	0.84	0.497667
MAPR10	91	H	E	0.365	0.02	0.205	0.775	0.518778
MAPR10	92	I	E	0.299	0.056	0.142	0.802	0.514889
MAPR10	93	G	E	0.398	0.018	0.047	0.935	0.506111
MAPR10	94	T	E	0.687	0.018	0.047	0.935	0.513778
MAPR10	95	K	E	0.473	0.004	0.197	0.799	0.505222
MAPR10	96	L	B	0.066	0.004	0.616	0.381	0.499
MAPR10	97	E	E	0.408	0.001	0.9	0.099	0.475889
MAPR10	98	I	E	0.284	0.001	0.959	0.04	0.482333
MAPR10	99	A	B	0.102	0.001	0.959	0.04	0.477
MAPR10	100	T	E	0.283	0.001	0.959	0.04	0.470111
MAPR10	101	S	B	0.181	0.001	0.959	0.04	0.473444
MAPR10	102	H	E	0.321	0.001	0.959	0.04	0.468778
MAPR10	103	F	B	0.121	0.001	0.959	0.04	0.481778
MAPR10	104	K	E	0.435	0.001	0.959	0.04	0.488556
MAPR10	105	F	B	0.115	0.001	0.959	0.04	0.493889
MAPR10	106	E	E	0.32	0.001	0.9	0.099	0.499778
MAPR10	107	P	E	0.332	0.002	0.816	0.182	0.503667
MAPR10	108	A	E	0.48	0.005	0.336	0.66	0.507333
MAPR10	109	S	E	0.673	0.005	0.045	0.951	0.499222
MAPR10	110	G	E	0.784	0.003	0.003	0.994	0.506333
MAPR10	111	G	E	0.649	0.005	0.015	0.979	0.490667
MAPR10	112	G	B	0.235	0.005	0.262	0.733	0.471556
MAPR10	113	C	B	0.119	0.002	0.816	0.182	0.452222
MAPR10	114	V	B	0.113	0.001	0.959	0.04	0.446
MAPR10	115	L	B	0.042	0.001	0.959	0.04	0.439889
MAPR10	116	K	B	0.238	0.001	0.959	0.04	0.431444
MAPR10	117	V	B	0.094	0.001	0.959	0.04	0.423889
MAPR10	118	V	B	0.135	0.001	0.959	0.04	0.429111
MAPR10	119	T	B	0.079	0.001	0.959	0.04	0.442556
MAPR10	120	T	E	0.285	0.006	0.962	0.032	0.468889
MAPR10	121	Y	B	0.083	0.011	0.918	0.071	0.493111
MAPR10	122	K	B	0.26	0.011	0.918	0.071	0.520556
MAPR10	123	L	E	0.28	0.021	0.756	0.223	0.525444
MAPR10	124	L	E	0.362	0.02	0.205	0.775	0.534667
MAPR10	125	P	E	0.593	0.018	0.019	0.964	0.545667
MAPR10	126	G	E	0.823	0.018	0.019	0.964	0.55
MAPR10	127	V	E	0.419	0.018	0.019	0.964	0.557222
MAPR10	128	E	E	0.724	0.018	0.047	0.935	0.548222
MAPR10	129	D	B	0.244	0.018	0.019	0.964	0.547889
MAPR10	130	D	E	0.399	0.053	0.005	0.942	0.529778
MAPR10	131	Q	E	0.613	0.406	0.004	0.59	0.532667
MAPR10	132	S	E	0.685	0.502	0.002	0.495	0.530889
MAPR10	133	E	E	0.363	0.6	0.003	0.397	0.523444
MAPR10	134	I	B	0.094	0.622	0.015	0.363	0.521
MAPR10	135	V	E	0.473	0.622	0.015	0.363	0.533889
MAPR10	136	R	E	0.43	0.717	0.014	0.269	0.528556
MAPR10	137	S	B	0.107	0.879	0.01	0.111	0.51
MAPR10	138	K	B	0.186	0.97	0.001	0.03	0.497111
MAPR10	139	E	E	0.534	0.97	0.001	0.03	0.497444
MAPR10	140	T	B	0.237	0.988	0	0.012	0.467222
MAPR10	141	V	B	0.032	0.988	0	0.012	0.436111
MAPR10	142	T	B	0.147	0.988	0	0.012	0.441667
MAPR10	143	G	E	0.375	0.988	0	0.012	0.432444
MAPR10	144	I	B	0.077	0.988	0	0.012	0.391778
MAPR10	145	I	B	0.048	0.988	0	0.012	0.384
MAPR10	146	K	E	0.324	0.988	0	0.012	0.399889
MAPR10	147	A	B	0.179	0.988	0	0.012	0.388889
MAPR10	148	A	B	0.028	0.97	0.001	0.03	0.367556
MAPR10	149	E	B	0.151	0.97	0.001	0.03	0.389333
MAPR10	150	A	E	0.447	0.97	0.001	0.03	0.413889
MAPR10	151	Y	B	0.154	0.97	0.001	0.03	0.414444
MAPR10	152	L	B	0.058	0.923	0.002	0.076	0.433667
MAPR10	153	V	E	0.304	0.782	0.003	0.216	0.467667
MAPR10	154	A	E	0.492	0.502	0.002	0.495	0.472556
MAPR10	155	N	E	0.286	0.053	0.005	0.942	0.475333
MAPR10	156	P	E	0.388	0.053	0.005	0.942	0.479667
MAPR10	157	A	E	0.742	0.058	0.017	0.925	0.452444
MAPR10	158	A	E	0.403	0.058	0.017	0.925	0.394889
MAPR10	159	Y	B	0.301	0.058	0.017	0.925	0.342889
MAPR10	160	P	E	0.815	0.003	0.003	0.994	0.282667

## Sheet: Table S3
Table S3. Summary of protein modelling via AlphaFold v2. Structure analyses were performed using SAVES and ProSA-web servers.
			ERRAT Overall Quality Factor	ProCheck (Ramachandran Plot)									ProSA-web server
No.	Protein	Length		Remark	Core (%)	Allow (%)	Gener (%)	Disall (%)	Error	Warning	Pass	Evaluation Number	Z-score (ProSA)
1	IgE B10	159aa	80.7339	Ramachandran Plot: Warning	91.8	8.2	0	0	2	1	5	8	-5.83
2	IgE B13	119aa	84.5455	Ramachandran Plot: Warning	93.8	6.2	0	0	3	1	4	8	-6.03
3	IgE B14	125aa	73.6842	Ramachandran Plot: Warning	91.5	7.5	0	0	2	3	3	8	-5.5
4	IgE M0418	126aa	72.973	Ramachandran Plot: ERROR	88.8	9.3	0.9	0.9	4	2	2	8	-5.2
5	Bet v 1	159aa	93.9597	Ramachandran Plot: Warning	96.3	3.7	0	0	2	1	5	8	-7.78
6	MaPR10-GNA5	159aa	96.0265	Ramachandran Plot: Warning	94.1	5.9	0	0	2	2	4	8	-5.51
7	MaPR10-BeB5	160aa	96.7105	Ramachandran Plot: Warning	91.9	8.1	0	0	2	1	5	8	-5.22

## Sheet: Table S4
Table S4. Details of interaction between scFv IgE and PR10 proteins.
Complex	Lowest interaction energy score	Number of hydrogen bonds	Number of non-bonded contacts
ScFv IgE B13–Bet v 1	-250	11	106
ScFv IgE B13–MaPR10-GNA5	-242.6	13	114
ScFv IgE B13–MaPR10-BeB5	-250.2	12	135

## Sheet: Table S5
Table S5. Non-bonded contacts between IgE B13 and (A) Bet v 1 , (B) MaPR10-BeB5 and (C) MaPR10-GNA5 proteins.
Table S5A. Non-bonded contacts between IgE B13 and Bet v 1 protein.										Table S5B. Non-bonded contacts between IgE B13 and MaPR10-BeB5 protein.										Table S5C. Non-bonded contacts between IgE B13 and MaPR10-GNA5 protein.										Table S5D. Non-bonded contacts between IgE B13 and hypothethical MaPR10-GNA5 protein with L59>F.										Table S5E. Non-bonded contacts between IgE B13 and hypothethical MaPR10-GNA5 protein with R136>G.
Bet v 1	Residue	Position	Atom	Ig E	Residue	Position	Atom	Note		MaPR10-BeB5	Residue	Position	Atom	Ig E	Residue	Position	Atom	Note		MaPR10-GNA5	Residue	Position	Atom	Ig E	Residue	Position	Atom	Note		MaPR10-GNA5_59L>F	Residue	Position	Atom	Ig E	Residue	Position	Atom	Note		MaPR10-GNA5_136R>G	Residue	Position	Atom	Ig E	Residue	Position	Atom	Note
/A	GLU	42	CD	/B	ARG	28	NH1			/A	ARG	21	NH2	/B	PRO	103	CG			/A	PRO	64	CG	/B	ASP	55	CB			/A	ARG	21	HH11	/B	ASP	104	CG			/A	ARG	21	HH11	/B	ASP	104	CG
/A	GLU	42	OE2	/B	ARG	28	NH1			/A	ARG	21	HH21	/B	ASP	104	CG			/A	LYS	95	CE	/B	TYR	52	CE1			/A	ARG	21	CZ	/B	PRO	103	CG			/A	ARG	21	NH1	/B	ASP	104	CG
/A	GLU	42	OE1	/B	ARG	28	NH1			/A	ARG	21	HH11	/B	ASP	104	CG			/A	LYS	95	NZ	/B	TYR	52	CE1			/A	ARG	21	NH1	/B	PRO	103	CG			/A	ARG	21	CZ	/B	ASP	104	OD1
/A	GLU	42	CG	/B	ARG	28	NH1			/A	ARG	21	NH1	/B	ASP	104	CG			/A	LYS	95	HZ3	/B	TYR	52	CE1			/A	ARG	21	HH21	/B	ASP	104	CG			/A	ARG	21	HH21	/B	ASP	104	CG
/A	GLU	42	CD	/B	ARG	28	HH11			/A	ARG	21	CZ	/B	ASP	104	CG			/A	LYS	95	HZ1	/B	ASP	55	CG			/A	ARG	21	NH2	/B	ASP	104	CG			/A	ARG	21	NH2	/B	ASP	104	CG
/A	GLU	42	OE1	/B	ARG	28	HH11	Hydrogen		/A	ARG	21	HH21	/B	ASP	104	OD1	Hydrogen		/A	LYS	95	HZ1	/B	ASP	55	OD2	Hydrogen		/A	ARG	21	HH21	/B	ASP	104	OD1			/A	ARG	21	HH11	/B	ASP	104	OD2
/A	GLU	42	CD	/B	ARG	28	HH12			/A	ARG	21	HH11	/B	ASP	104	OD2	Hydrogen		/A	LYS	95	NZ	/B	ASP	55	OD2			/A	ARG	21	HH11	/B	ASP	104	OD2			/A	ARG	21	HH21	/B	ASP	104	OD1
/A	GLU	42	OE2	/B	ARG	28	HH12			/A	ARG	21	NH2	/B	ASP	104	CG			/A	LYS	95	CE	/B	ASP	55	OD2			/A	ARG	21	NH1	/B	ASP	104	CG			/A	ARG	21	HH11	/B	ASP	104	OD1
/A	GLU	42	OE2	/B	ARG	28	HH11			/A	ARG	21	NH2	/B	ASP	104	OD1			/A	PRO	125	O	/B	ARG	28	CZ			/A	ARG	21	HH11	/B	ASP	104	OD1			/A	ARG	21	NH1	/B	ASP	104	OD2
/A	GLU	42	OE2	/B	ASN	31	HD22	Hydrogen		/A	ARG	21	NH1	/B	ASP	104	OD2			/A	PRO	125	C	/B	ARG	28	NH2			/A	ARG	21	NH1	/B	ASP	104	OD2			/A	ARG	21	NH2	/B	ASP	104	OD1
/A	GLU	42	CD	/B	ASN	31	HD22			/A	ARG	21	CZ	/B	ASP	104	OD2			/A	PRO	125	O	/B	ARG	28	HH21	Hydrogen		/A	ARG	21	CZ	/B	ASP	104	OD1			/A	ARG	21	NH1	/B	ASP	104	OD1
/A	GLU	42	OE2	/B	ASN	31	ND2			/A	ARG	21	HH21	/B	ASP	104	OD2	Hydrogen		/A	PRO	125	O	/B	ARG	28	NH2			/A	ARG	21	NH2	/B	ASP	104	OD1			/A	LEU	25	CD1	/B	PRO	103	CD
/A	ILE	44	CG2	/B	ASN	31	ND2			/A	ARG	21	CZ	/B	ASP	104	OD1			/A	PRO	125	C	/B	ARG	28	HH21			/A	ARG	21	NH1	/B	ASP	104	OD1			/A	LEU	25	CD2	/B	GLY	101	O
/A	ILE	44	CB	/B	TYR	32	OH			/A	ARG	21	NH2	/B	ASP	104	OD2			/A	GLY	126	O	/B	ARG	28	CZ			/A	LEU	25	CD1	/B	PRO	103	CD			/A	LEU	25	CB	/B	ILE	102	CG1
/A	ILE	44	CD1	/B	TYR	32	CE1			/A	LEU	25	CD2	/B	ILE	102	CG1			/A	GLY	126	CA	/B	ARG	28	NH2			/A	LEU	25	CD2	/B	GLY	101	O			/A	LEU	25	CD2	/B	ILE	102	CG1
/A	ILE	44	O	/B	TYR	32	OH	Hydrogen		/A	GLU	46	CB	/B	ARG	28	NH1			/A	GLY	126	C	/B	ARG	28	CZ			/A	LEU	25	CD1	/B	PRO	103	CG			/A	GLU	46	OE1	/B	ARG	28	NH2
/A	ILE	44	C	/B	TYR	32	OH			/A	GLU	46	OE1	/B	ARG	28	NH2			/A	GLY	126	C	/B	ARG	28	NH1			/A	GLU	46	OE1	/B	ARG	28	CZ			/A	GLU	46	OE2	/B	ARG	28	CZ
/A	ILE	44	CG2	/B	ASN	31	HD21			/A	GLU	46	OE2	/B	ARG	28	CZ			/A	GLY	126	O	/B	ARG	28	NH1			/A	GLU	46	OE2	/B	ARG	28	CZ			/A	GLU	46	CB	/B	ARG	28	NH1
/A	ILE	44	O	/B	TYR	32	HH			/A	GLU	46	CD	/B	ARG	28	CZ			/A	VAL	127	CG2	/B	ARG	28	NH1			/A	GLU	46	CD	/B	ARG	28	CZ			/A	GLU	46	CD	/B	ARG	28	CZ
/A	ILE	44	C	/B	TYR	32	HH			/A	GLU	46	CG	/B	ARG	28	HH11			/A	VAL	127	CA	/B	TYR	32	OH			/A	GLU	46	CD	/B	ARG	28	HH21			/A	GLU	46	CD	/B	ARG	28	HH21
/A	ILE	44	CB	/B	TYR	32	HH			/A	GLU	46	CD	/B	ARG	28	HH21			/A	VAL	127	CG1	/B	ASN	31	CB			/A	GLU	46	CD	/B	ARG	28	HH11			/A	GLU	46	OE2	/B	ARG	28	HH11
/A	GLU	45	OE2	/B	ARG	98	CZ			/A	GLU	46	OE2	/B	ARG	28	HH11	Hydrogen		/A	VAL	127	C	/B	TYR	32	OH			/A	GLU	46	CD	/B	ARG	28	NH2			/A	GLU	46	CD	/B	ARG	28	NH2
/A	GLU	45	CG	/B	TYR	32	CE1			/A	GLU	46	CD	/B	ARG	28	NH2			/A	VAL	127	CG2	/B	ARG	28	HH11			/A	GLU	46	OE1	/B	ARG	28	HH11			/A	GLU	46	OE1	/B	ARG	28	HH21
/A	GLU	45	OE1	/B	TYR	32	CE1			/A	GLU	46	OE1	/B	ARG	28	HH21	Hydrogen		/A	VAL	127	CG2	/B	ASN	31	OD1			/A	GLU	46	CD	/B	ARG	28	NH1			/A	GLU	46	CD	/B	ARG	28	HH11
/A	GLU	45	CD	/B	TYR	32	CE1			/A	GLU	46	CD	/B	ARG	28	HH11			/A	VAL	127	CG2	/B	ASN	31	CG			/A	GLU	46	OE2	/B	ARG	28	HH21			/A	GLU	46	OE2	/B	ARG	28	HH21
/A	GLU	45	CD	/B	ARG	98	HH11			/A	GLU	46	CD	/B	ARG	28	NH1			/A	VAL	127	CG1	/B	ASN	31	CG			/A	GLU	46	OE1	/B	ARG	28	HH21			/A	GLU	46	CD	/B	ARG	28	NH1
/A	GLU	45	OE2	/B	ARG	98	HH11	Hydrogen		/A	GLU	46	OE2	/B	ARG	28	NH1			/A	VAL	127	CG2	/B	ARG	28	HH12			/A	GLU	46	OE2	/B	ARG	28	HH11			/A	GLU	46	OE2	/B	ARG	28	NH1
/A	GLU	45	CD	/B	ARG	98	NH1			/A	GLU	46	CB	/B	ARG	28	HH11			/A	GLU	128	OE1	/B	TYR	32	CE1			/A	GLU	46	OE1	/B	ARG	28	NH1			/A	GLU	46	CB	/B	ARG	28	HH11
/A	GLU	45	OE2	/B	ARG	98	NH1			/A	GLU	46	OE2	/B	ARG	28	HH21	Hydrogen		/A	GLU	128	CD	/B	TYR	32	CE1			/A	GLU	46	OE2	/B	ARG	28	NH2			/A	GLU	46	OE2	/B	ARG	28	NH2
/A	GLU	45	OE2	/B	ARG	98	HH21	Hydrogen		/A	GLU	46	OE2	/B	ARG	28	NH2			/A	GLU	128	N	/B	TYR	32	OH			/A	GLU	46	OE2	/B	ARG	28	NH1			/A	ASP	48	H	/B	TYR	32	OH
/A	GLU	45	CG	/B	ARG	98	HH11			/A	GLY	47	CA	/B	TYR	32	OH			/A	GLU	128	CB	/B	TYR	32	CE1			/A	GLU	46	OE1	/B	ARG	28	NH2			/A	ASP	48	OD1	/B	TYR	32	CE1
/A	GLU	45	OE2	/B	ARG	98	NH2			/A	ASP	48	OD1	/B	TYR	32	CE1			/A	GLU	128	CG	/B	TYR	32	OH			/A	ASP	48	OD1	/B	TYR	32	CE1			/A	ASP	48	O	/B	TRP	105	CZ3
/A	GLU	45	OE1	/B	GLY	100	CA			/A	ASP	48	H	/B	TYR	32	OH	Hydrogen		/A	GLU	128	OE2	/B	ARG	98	CZ			/A	ASP	48	CB	/B	TYR	32	OH			/A	ASP	48	OD2	/B	ARG	98	NH1
/A	GLU	45	OE2	/B	GLY	100	CA			/A	ASP	48	CG	/B	TYR	32	CE1			/A	GLU	128	H	/B	TYR	32	CE1			/A	ASP	48	O	/B	TRP	105	CZ3			/A	ASP	48	CG	/B	TYR	32	CE1
/A	GLU	45	CD	/B	GLY	100	CA			/A	ASP	48	N	/B	TYR	32	OH			/A	GLU	128	CD	/B	ARG	98	HH11			/A	ASP	48	CG	/B	TYR	32	CE1			/A	ASP	48	N	/B	TYR	32	OH
/A	GLU	45	OE1	/B	GLY	100	C			/A	ASP	48	CB	/B	TYR	32	OH			/A	GLU	128	OE1	/B	ARG	98	HH11	Hydrogen		/A	ASP	48	N	/B	TYR	32	HH			/A	ASP	48	CB	/B	TYR	32	OH
/A	GLU	45	OE1	/B	GLY	101	H	Hydrogen		/A	ASP	48	OD2	/B	ARG	98	NH1			/A	GLU	128	CD	/B	ARG	98	NH1			/A	ASP	48	H	/B	TYR	32	OH			/A	ASP	48	C	/B	TRP	105	CZ3
/A	GLU	45	OE1	/B	GLY	101	N			/A	ASP	48	O	/B	TRP	105	CZ3			/A	GLU	128	CD	/B	TYR	32	HH			/A	ASP	48	C	/B	TRP	105	CZ3			/A	ASP	48	OD2	/B	ARG	98	HH11
/A	GLU	45	CD	/B	GLY	101	H			/A	ASP	48	C	/B	TRP	105	CZ3			/A	GLU	128	CG	/B	TRP	105	CZ3			/A	ASP	48	OD2	/B	TYR	32	CE1			/A	ASP	48	H	/B	TYR	32	HH
/A	GLU	45	OE2	/B	TRP	105	CE3			/A	ASP	48	OD1	/B	TYR	32	HH	Hydrogen		/A	GLU	128	OE2	/B	ARG	98	HH11	Hydrogen		/A	ASP	48	CA	/B	TYR	32	HH			/A	ASP	48	OD1	/B	TYR	32	HH
/A	GLU	45	CG	/B	TRP	105	CZ3			/A	ASP	48	H	/B	TYR	32	HH			/A	GLU	128	CG	/B	TYR	32	HH			/A	ASP	48	CG	/B	TYR	32	HH			/A	ASP	48	CG	/B	ARG	98	HH11
/A	GLY	46	H	/B	TRP	105	CH2			/A	ASP	48	CG	/B	TYR	32	HH			/A	GLU	128	OE1	/B	TYR	32	HH			/A	ASP	48	OD1	/B	TYR	32	HH			/A	ASP	48	CG	/B	TYR	32	HH
/A	GLY	46	N	/B	TRP	105	CH2			/A	ASP	48	N	/B	TYR	32	HH			/A	GLU	128	H	/B	TYR	32	OH			/A	ASP	48	H	/B	TYR	32	HH			/A	ASP	48	O	/B	TRP	105	CH2
/A	ILE	53	CD1	/B	GLY	101	CA			/A	ASP	48	OD1	/B	TYR	32	CZ			/A	GLU	128	OE2	/B	GLY	100	CA			/A	ASP	48	CB	/B	TYR	32	HH			/A	ASP	48	OD2	/B	TRP	105	CE3
/A	ILE	53	CD1	/B	GLY	101	C			/A	ASP	48	OD1	/B	TYR	32	OH			/A	GLU	128	OE1	/B	ARG	98	NH1			/A	ASP	48	CG	/B	TYR	32	OH			/A	ASP	48	N	/B	TYR	32	HH
/A	ILE	53	CD1	/B	ILE	102	CG2			/A	ASP	48	CG	/B	TYR	32	OH			/A	GLU	128	OE1	/B	TYR	32	CZ			/A	ASP	48	OD1	/B	TYR	32	CZ			/A	ASP	48	CG	/B	ARG	98	NH1
/A	LYS	55	CD	/B	ASN	31	CG			/A	ASP	48	CG	/B	ARG	98	HH11			/A	GLU	128	OE2	/B	ARG	98	NH1			/A	ASP	48	OD1	/B	TYR	32	OH			/A	ASP	48	CG	/B	TYR	32	OH
/A	LYS	55	CE	/B	ASN	31	OD1			/A	ASP	48	OD2	/B	ARG	98	HH11	Hydrogen		/A	GLU	128	H	/B	TYR	32	CZ			/A	ASP	48	CG	/B	TYR	32	CZ			/A	ASP	48	OD2	/B	TRP	105	CZ3
/A	LYS	55	HZ3	/B	ASN	31	CG			/A	ASP	48	CG	/B	ARG	98	NH1			/A	GLU	128	CD	/B	TYR	32	OH			/A	ASP	48	OD2	/B	ARG	98	HH11			/A	ASP	48	OD1	/B	TYR	32	OH
/A	LYS	55	HZ2	/B	TYR	52	CE1			/A	ASP	48	CB	/B	ARG	98	HH11			/A	GLU	128	CB	/B	TYR	32	OH			/A	ASP	48	OD2	/B	ARG	98	NH1			/A	ASP	48	OD1	/B	TYR	32	CZ
/A	LYS	55	NZ	/B	ASN	31	CG			/A	ASP	48	OD2	/B	TRP	105	CE3			/A	GLU	128	OE1	/B	TYR	32	OH			/A	ASP	48	CG	/B	ARG	98	HH11			/A	ASP	48	CG	/B	TRP	105	CZ3
/A	LYS	55	HZ3	/B	ASN	31	OD1	Hydrogen		/A	ASP	48	O	/B	TRP	105	CH2			/A	GLU	128	CB	/B	TYR	32	HH			/A	ASP	48	CG	/B	ARG	98	NH1			/A	ASP	48	CB	/B	TYR	32	HH
/A	LYS	55	CD	/B	ASN	31	OD1			/A	ASP	48	OD2	/B	TRP	105	CZ3			/A	GLU	128	N	/B	TYR	32	HH			/A	ASP	48	O	/B	TRP	105	CH2			/A	ASP	48	CB	/B	ARG	98	HH11
/A	LYS	55	NZ	/B	ASN	31	OD1			/A	ASP	48	CG	/B	TRP	105	CZ3			/A	GLU	128	CG	/B	TRP	105	CE3			/A	ASP	48	OD2	/B	TRP	105	CZ3			/A	GLY	49	CA	/B	TRP	105	CZ3
/A	LYS	55	CD	/B	ASN	31	ND2			/A	GLY	49	CA	/B	TRP	105	CZ3			/A	GLU	128	CD	/B	TRP	105	CZ3			/A	ASP	48	OD2	/B	TRP	105	CE3			/A	GLY	49	CA	/B	TRP	105	CH2
/A	LYS	55	HZ2	/B	TYR	52	OH	Hydrogen		/A	GLY	49	CA	/B	TRP	105	CH2			/A	GLU	128	OE2	/B	TRP	105	CE3			/A	ASP	48	CG	/B	TRP	105	CZ3			/A	SER	50	CB	/B	GLY	101	N
/A	LYS	55	CE	/B	TYR	52	OH			/A	SER	50	OG	/B	GLY	100	CA			/A	GLU	128	CD	/B	TRP	105	CE3			/A	GLY	49	CA	/B	TRP	105	CZ3			/A	SER	50	OG	/B	GLY	100	CA
/A	LYS	55	HZ2	/B	TYR	52	CZ			/A	SER	50	CB	/B	GLY	101	N			/A	GLU	128	H	/B	TYR	32	HH			/A	GLY	49	CA	/B	TRP	105	CH2			/A	SER	50	N	/B	TRP	105	CZ3
/A	LYS	55	CD	/B	TYR	52	OH			/A	SER	50	N	/B	TRP	105	CZ3			/A	GLU	128	CD	/B	TYR	32	CZ			/A	SER	50	CB	/B	GLY	101	N			/A	SER	50	CB	/B	GLY	101	CA
/A	LYS	55	NZ	/B	TYR	52	OH			/A	SER	50	OG	/B	GLY	100	C			/A	ASP	129	O	/B	GLY	101	CA			/A	SER	50	OG	/B	GLY	100	CA			/A	SER	50	CB	/B	GLY	101	H
/A	LYS	55	NZ	/B	TYR	52	CZ			/A	SER	50	CB	/B	GLY	101	H			/A	ASP	129	C	/B	GLY	101	CA			/A	SER	50	N	/B	TRP	105	CZ3			/A	SER	50	OG	/B	GLY	101	H
/A	LYS	55	NZ	/B	TYR	52	CE1			/A	SER	50	CB	/B	GLY	101	CA			/A	ASP	130	CA	/B	GLY	101	CA			/A	SER	50	OG	/B	GLY	100	C			/A	SER	50	CB	/B	TRP	105	CZ3
/A	LYS	65	HZ2	/B	ASP	55	CG			/A	SER	50	OG	/B	GLY	101	H	Hydrogen		/A	ASP	130	OD2	/B	TRP	33	CD1			/A	SER	50	CB	/B	GLY	101	H			/A	SER	50	CB	/B	ILE	102	CG1
/A	LYS	65	HZ3	/B	ASP	55	CG			/A	SER	50	OG	/B	GLY	101	N			/A	ASP	130	CG	/B	TRP	33	CD1			/A	SER	50	CB	/B	GLY	101	CA			/A	SER	50	OG	/B	GLY	101	N
/A	LYS	65	HZ1	/B	ASP	57	CB			/A	SER	50	CB	/B	GLY	101	C			/A	ASP	130	N	/B	GLY	101	CA			/A	SER	50	OG	/B	GLY	101	H			/A	SER	50	CB	/B	GLY	101	C
/A	LYS	65	CE	/B	ASP	55	CG			/A	SER	50	OG	/B	GLY	101	CA			/A	ASP	130	OD2	/B	TRP	33	HE1	Hydrogen		/A	SER	50	CB	/B	GLY	101	C			/A	SER	50	OG	/B	GLY	101	CA
/A	LYS	65	CD	/B	ASP	55	CB			/A	SER	50	CB	/B	ILE	102	CG1			/A	ASP	130	OD2	/B	TRP	33	NE1			/A	SER	50	OG	/B	GLY	101	N			/A	SER	50	CB	/B	ILE	102	N
/A	LYS	65	NZ	/B	ASP	55	CB			/A	SER	50	CB	/B	ILE	102	N			/A	GLN	131	CG	/B	GLY	101	O			/A	SER	50	OG	/B	GLY	101	CA			/A	SER	50	CB	/B	ILE	102	CD1
/A	LYS	65	NZ	/B	ASP	55	CG			/A	SER	50	CB	/B	ILE	102	CD1			/A	GLN	131	H	/B	GLY	101	CA			/A	SER	50	CB	/B	ILE	102	CG1			/A	SER	50	OG	/B	GLY	100	C
/A	LYS	65	HZ2	/B	ASP	55	OD2	Hydrogen		/A	SER	50	CB	/B	TRP	105	CZ3			/A	GLN	131	HE21	/B	GLY	101	O	Hydrogen		/A	SER	50	CB	/B	ILE	102	N			/A	SER	50	CB	/B	TRP	105	CE3
/A	LYS	65	CE	/B	ASP	55	OD2			/A	SER	50	CB	/B	TRP	105	CE3			/A	GLN	131	N	/B	GLY	101	CA			/A	SER	50	CB	/B	ILE	102	CD1			/A	VAL	51	CB	/B	ASN	31	O
/A	LYS	65	NZ	/B	ASP	55	OD1			/A	VAL	51	C	/B	ASN	31	O			/A	GLN	131	NE2	/B	GLY	101	O			/A	SER	50	CB	/B	TRP	105	CZ3			/A	VAL	51	CG2	/B	TYR	32	CD1
/A	LYS	65	HZ2	/B	ASP	55	OD1			/A	VAL	51	CB	/B	ASN	31	O			/A	SER	132	CB	/B	TRP	33	CE2			/A	SER	50	CB	/B	TRP	105	CE3			/A	VAL	51	CG1	/B	ASN	31	O
/A	LYS	65	CD	/B	ASP	55	CG			/A	VAL	51	CG2	/B	ASN	31	O			/A	SER	132	OG	/B	TRP	33	CD1			/A	VAL	51	CG1	/B	GLY	101	CA			/A	VAL	51	C	/B	ASN	31	O
/A	LYS	65	NZ	/B	ASP	55	OD2			/A	VAL	51	O	/B	TYR	32	CE1			/A	SER	132	HG	/B	TRP	33	CD1			/A	VAL	51	CG2	/B	ASN	31	O			/A	VAL	51	O	/B	TYR	32	CE1
/A	LYS	65	CD	/B	ASP	55	OD2			/A	VAL	51	CG1	/B	GLY	101	CA			/A	SER	132	CB	/B	TRP	33	NE1			/A	VAL	51	O	/B	TYR	32	CE1			/A	VAL	51	CG2	/B	GLY	101	N
/A	LYS	65	HZ3	/B	ASP	55	OD1			/A	VAL	51	H	/B	GLY	101	N			/A	SER	132	CB	/B	TRP	33	CD1			/A	VAL	51	C	/B	ASN	31	O			/A	VAL	51	CG2	/B	GLY	101	H
/A	LYS	65	HZ1	/B	ASP	57	OD2	Hydrogen		/A	VAL	51	N	/B	GLY	101	N			/A	SER	132	CB	/B	TRP	33	HE1			/A	VAL	51	CB	/B	ASN	31	O			/A	VAL	51	CG2	/B	GLY	101	CA
/A	LYS	65	NZ	/B	ASP	57	CB			/A	VAL	51	CG2	/B	TYR	32	CD1			/A	ARG	136	HH11	/B	ASP	55	CG			/A	VAL	51	N	/B	GLY	101	H			/A	VAL	51	CG2	/B	TYR	32	CE1
/A	LYS	65	HZ1	/B	ASP	57	CG			/A	VAL	51	O	/B	TYR	32	CZ			/A	ARG	136	NH2	/B	ASP	55	CG			/A	VAL	51	CG2	/B	TYR	32	CD1			/A	VAL	51	CG2	/B	GLY	100	CA
/A	LYS	65	NZ	/B	ASP	57	OD2			/A	VAL	51	CG2	/B	TYR	32	CE1			/A	ARG	136	NH1	/B	ASP	55	CG			/A	VAL	51	CG2	/B	TYR	32	CE1			/A	VAL	51	O	/B	TYR	32	CZ
/A	LYS	65	HZ3	/B	ASP	57	CB			/A	VAL	51	CG2	/B	TYR	32	CA			/A	ARG	136	HH21	/B	ASP	55	CB			/A	VAL	51	O	/B	TYR	32	CZ			/A	VAL	51	CG2	/B	GLY	100	C
/A	LYS	65	NZ	/B	ASP	57	CG			/A	VAL	51	CG2	/B	LEU	99	O			/A	ARG	136	HH22	/B	ASP	57	CB			/A	VAL	51	CG2	/B	GLY	101	N			/A	VAL	51	CB	/B	TYR	32	CD1
/A	LYS	65	CE	/B	ASP	57	OD2			/A	VAL	51	CG2	/B	GLY	101	N			/A	ARG	136	HE	/B	ASP	57	OD2			/A	VAL	51	CG2	/B	GLY	101	H			/A	VAL	51	CG2	/B	LEU	99	O
/A	TYR	66	CD1	/B	ASP	55	OD2			/A	VAL	51	H	/B	GLY	101	H			/A	ARG	136	NE	/B	ASP	57	OD2			/A	VAL	51	CG2	/B	GLY	101	CA			/A	GLY	52	CA	/B	ASN	31	CB
/A	TYR	66	CE2	/B	TYR	52	CZ			/A	VAL	51	N	/B	GLY	101	H			/A	ARG	136	CZ	/B	ASP	55	CG			/A	VAL	51	N	/B	GLY	101	CA			/A	GLY	52	O	/B	ASN	31	ND2
/A	TYR	66	CZ	/B	TYR	52	CE1			/A	VAL	51	CG2	/B	GLY	101	H			/A	ARG	136	HH21	/B	ASP	55	CG			/A	GLY	52	CA	/B	ASN	31	CB			/A	GLY	52	C	/B	ASN	31	ND2
/A	TYR	66	CE1	/B	TYR	52	CE1			/A	VAL	51	N	/B	GLY	101	CA			/A	ARG	136	NH2	/B	ASP	57	CB			/A	GLY	52	C	/B	ASN	31	HD21			/A	GLY	52	CA	/B	ASN	31	HD21
/A	TYR	66	CE2	/B	TYR	52	HH			/A	GLY	52	CA	/B	ASN	31	CB			/A	ARG	136	HH11	/B	ASP	55	OD2	Hydrogen		/A	GLY	52	O	/B	ASN	31	HD21			/A	GLY	52	CA	/B	ASN	31	ND2
/A	TYR	66	CE2	/B	TYR	52	OH			/A	GLY	52	C	/B	ASN	31	CB			/A	ARG	136	HH21	/B	ASP	55	OD1	Hydrogen		/A	GLY	52	CA	/B	ASN	31	HD21			/A	GLY	52	C	/B	ASN	31	HD21
/A	TYR	66	CZ	/B	TYR	52	CZ			/A	GLY	52	O	/B	ASN	31	CG			/A	ARG	136	CZ	/B	ASP	57	OD2			/A	GLY	52	CA	/B	ASN	31	ND2			/A	GLY	52	O	/B	ASN	31	HD21
/A	TYR	66	CE1	/B	ASP	55	OD2			/A	GLY	52	O	/B	ASN	31	HD21	Hydrogen		/A	ARG	136	HH11	/B	ASP	55	OD1	Hydrogen		/A	GLY	52	CA	/B	ASN	31	O			/A	ASP	73	O	/B	TYR	52	OH
/A	LYS	68	CE	/B	ASN	31	O			/A	GLY	52	O	/B	ASN	31	ND2			/A	ARG	136	NH2	/B	ASP	57	CG			/A	ARG	55	HH22	/B	ILE	102	CD1			/A	ASP	73	C	/B	TYR	52	OH
/A	LYS	68	NZ	/B	ASN	31	O			/A	GLY	52	C	/B	ASN	31	HD21			/A	ARG	136	CZ	/B	ASP	57	CB			/A	ARG	55	HH21	/B	ILE	102	CD1			/A	ASP	73	O	/B	TYR	52	HH
/A	LYS	68	HZ1	/B	ASN	31	C			/A	GLY	52	C	/B	ASN	31	ND2			/A	ARG	136	NH2	/B	ASP	55	OD1			/A	ARG	55	NH2	/B	ILE	102	CG1			/A	ASP	73	C	/B	TYR	52	HH
/A	LYS	68	HZ1	/B	ASN	31	O	Hydrogen		/A	GLY	52	CA	/B	ASN	31	O			/A	ARG	136	NH1	/B	ASP	55	OD2			/A	ARG	55	NH2	/B	ILE	102	CD1			/A	PHE	74	CZ	/B	ARG	59	NH2
/A	LYS	68	CE	/B	TYR	52	HH			/A	GLY	52	CA	/B	ASN	31	ND2			/A	ARG	136	CZ	/B	ASP	55	OD1			/A	ASP	73	C	/B	TYR	52	OH			/A	PHE	74	CD2	/B	TRP	33	CZ2
/A	ARG	70	CD	/B	ILE	102	CG2			/A	GLY	52	CA	/B	ASN	31	CG			/A	ARG	136	NH2	/B	ASP	57	OD2			/A	ASP	73	O	/B	TYR	52	CZ			/A	PHE	74	CB	/B	TYR	52	CE2
/A	GLU	87	CG	/B	TRP	33	NE1			/A	VAL	54	CG2	/B	ARG	28	NH1			/A	ARG	136	HH22	/B	ASP	57	OD2			/A	ASP	73	O	/B	TYR	52	HH			/A	PHE	74	CE2	/B	TRP	33	CE2
/A	GLU	87	CD	/B	TRP	33	CD1			/A	VAL	54	CG2	/B	ARG	28	HH11			/A	ARG	136	HH22	/B	ASP	57	CG			/A	ASP	73	C	/B	TYR	52	HH			/A	PHE	74	CE2	/B	TRP	33	CZ2
/A	GLU	87	OE1	/B	TRP	33	HE1			/A	ARG	71	HH12	/B	ASN	31	CG			/A	ARG	136	NH1	/B	ASP	55	OD1			/A	ASP	73	O	/B	TYR	52	OH			/A	PHE	74	CZ	/B	ARG	59	HH21
/A	GLU	87	OE2	/B	TRP	33	CD1			/A	ARG	71	HH11	/B	ASN	31	CA			/A	ARG	136	HH21	/B	ASP	57	CB			/A	PHE	74	CE2	/B	TRP	33	CZ2			/A	PHE	74	CE2	/B	ARG	59	NH2
/A	GLU	87	CD	/B	TRP	33	HE1			/A	ARG	71	NH1	/B	ASN	31	CA			/A	ARG	136	CZ	/B	ASP	55	OD2			/A	PHE	74	CB	/B	TRP	33	NE1			/A	PHE	74	CB	/B	TYR	52	CZ
/A	GLU	87	CG	/B	TRP	33	HE1			/A	ARG	71	HH21	/B	TYR	52	CE1			/A	ARG	136	CZ	/B	ASP	57	CG			/A	PHE	74	CD2	/B	TRP	33	CE2			/A	PHE	74	CE2	/B	ASP	57	OD2
/A	GLU	87	CD	/B	TRP	33	NE1			/A	ARG	71	CZ	/B	TYR	52	OH			/A	GLU	139	CD	/B	ARG	59	NH1			/A	PHE	74	CZ	/B	TRP	33	CZ2			/A	VAL	75	CG2	/B	GLY	101	CA
/A	GLU	87	OE1	/B	TYR	52	CE2			/A	ARG	71	NH2	/B	TYR	52	CE1			/A	GLU	139	OE1	/B	ARG	59	NH1			/A	PHE	74	CG	/B	TRP	33	NE1			/A	VAL	75	O	/B	TRP	33	CD1
										/A	ARG	71	NH1	/B	ASN	31	CG			/A	GLU	139	OE2	/B	ARG	59	CZ			/A	PHE	74	CD2	/B	TRP	33	CZ2			/A	VAL	75	C	/B	TRP	33	HE1
										/A	ARG	71	NH1	/B	ASN	31	OD1			/A	GLU	139	CD	/B	ARG	59	HH11			/A	PHE	74	CE2	/B	TRP	33	CH2			/A	VAL	75	CB	/B	GLY	101	CA
										/A	ARG	71	HH12	/B	ASN	31	OD1			/A	GLU	139	OE1	/B	ARG	59	HH11	Hydrogen		/A	PHE	74	CB	/B	TYR	52	CE2			/A	VAL	75	O	/B	TRP	33	HE1
										/A	ARG	71	NH1	/B	ASN	31	CB			/A	GLU	139	OE2	/B	ARG	59	HH21	Hydrogen		/A	PHE	74	CB	/B	TYR	52	CD2			/A	VAL	75	O	/B	TRP	33	NE1
										/A	ARG	71	HH12	/B	ASN	31	ND2			/A	GLU	139	OE2	/B	ARG	59	HH11	Hydrogen		/A	PHE	74	CE2	/B	ASP	57	OD2			/A	ASP	76	OD2	/B	ARG	59	CZ
										/A	ARG	71	HH11	/B	ASN	31	CG			/A	GLU	139	OE2	/B	ARG	59	NH2			/A	PHE	74	CZ	/B	ARG	59	NH2			/A	ASP	76	CG	/B	ARG	59	NH1
										/A	ARG	71	HH21	/B	TYR	52	OH			/A	GLU	139	OE2	/B	ARG	59	NH1			/A	PHE	74	CE2	/B	ARG	59	NH2			/A	ASP	76	CG	/B	ARG	59	HH11
										/A	ARG	71	NH2	/B	TYR	52	OH			/A	GLU	139	CD	/B	ARG	59	HH21			/A	PHE	74	CZ	/B	ARG	59	HH21			/A	ASP	76	OD2	/B	ARG	59	HH21
										/A	ARG	71	HH21	/B	TYR	52	CZ													/A	PHE	74	CZ	/B	ARG	59	NH1			/A	ASP	76	OD2	/B	ARG	59	HH11
										/A	ARG	71	NH2	/B	TYR	52	CZ													/A	PHE	74	CZ	/B	ARG	59	CZ			/A	ASP	76	OD2	/B	ARG	59	NH2
										/A	ARG	71	NH2	/B	TYR	52	HH													/A	VAL	75	O	/B	TRP	33	CD1			/A	ASP	76	OD2	/B	ARG	59	NH1
										/A	ARG	71	NH1	/B	TYR	52	OH													/A	VAL	75	C	/B	TRP	33	HE1			/A	ASP	76	CG	/B	ARG	59	HH21
										/A	ASP	73	O	/B	TYR	52	CE2													/A	VAL	75	CG2	/B	GLY	101	CA			/A	ASP	78	CG	/B	ARG	59	NH1
										/A	ASP	73	C	/B	TYR	52	HH													/A	VAL	75	O	/B	TRP	33	HE1			/A	ASP	78	OD2	/B	ARG	59	NH1
										/A	ASP	73	O	/B	TYR	52	HH	Hydrogen												/A	VAL	75	O	/B	TRP	33	NE1			/A	ASP	78	OD1	/B	ARG	59	HH12
										/A	ASP	73	O	/B	TYR	52	OH													/A	ASP	76	OD2	/B	ARG	59	NH1			/A	ASP	78	CG	/B	ARG	59	HH12
										/A	ASP	73	O	/B	TYR	52	CZ													/A	ASP	76	CG	/B	ARG	59	NH1			/A	ASP	78	OD2	/B	ARG	59	HH12
										/A	PHE	74	CD2	/B	TRP	33	CE2													/A	ASP	76	CB	/B	ARG	59	NH1			/A	ASP	78	CG	/B	ARG	59	HH11
										/A	PHE	74	CE2	/B	TRP	33	CZ2													/A	ASP	76	OD2	/B	ARG	59	HH12			/A	ASP	78	OD2	/B	ARG	59	HH11
										/A	PHE	74	CB	/B	TRP	33	HE1													/A	ASP	76	CG	/B	ARG	59	HH12			/A	LYS	83	NZ	/B	ASP	55	CG
										/A	PHE	74	CZ	/B	ARG	59	NH1													/A	LYS	79	HZ1	/B	ARG	59	NH1			/A	LYS	83	HZ1	/B	ASP	55	CG
										/A	PHE	74	CD2	/B	TRP	33	HE1													/A	LYS	79	NZ	/B	ARG	59	NH1			/A	LYS	83	HZ3	/B	ASP	55	CG
										/A	PHE	74	CD2	/B	TRP	33	NE1													/A	LYS	79	HZ1	/B	ARG	59	HH12			/A	LYS	83	HZ3	/B	ASP	55	OD1
										/A	PHE	74	CD2	/B	TRP	33	CZ2													/A	GLU	81	OE1	/B	ARG	59	NH1			/A	LYS	83	HZ1	/B	ASP	55	OD2
										/A	PHE	74	CZ	/B	ARG	59	HH11													/A	GLU	81	CD	/B	ARG	59	HH11			/A	LYS	83	NZ	/B	ASP	55	OD1
										/A	VAL	77	CG1	/B	PRO	103	CD													/A	GLU	81	OE1	/B	ARG	59	HH11			/A	LYS	83	NZ	/B	ASP	55	OD2
										/A	LYS	83	NZ	/B	ASP	55	OD2													/A	LYS	83	NZ	/B	ASP	55	CG
										/A	LYS	83	HZ1	/B	ASP	55	CG													/A	LYS	83	HZ1	/B	ASP	57	CB
										/A	LYS	83	HZ1	/B	ASP	55	OD2	Hydrogen												/A	LYS	83	CE	/B	ASP	55	OD2
																														/A	LYS	83	HZ2	/B	ASP	55	CG
																														/A	LYS	83	CD	/B	ASP	55	OD2
																														/A	LYS	83	HZ3	/B	ASP	55	CB
																														/A	LYS	83	HZ3	/B	ASP	55	CG
																														/A	LYS	83	HZ3	/B	ASP	55	OD2
																														/A	LYS	83	NZ	/B	ASP	55	OD2
																														/A	LYS	83	NZ	/B	ASP	55	OD1
																														/A	LYS	83	HZ3	/B	ASP	55	OD1
																														/A	LYS	83	HZ2	/B	ASP	55	OD2
																														/A	LYS	83	HZ1	/B	ASP	57	OD2
																														/A	LYS	83	HZ1	/B	ASP	57	CG
																														/A	LYS	83	CE	/B	ASP	57	OD2
																														/A	LYS	83	NZ	/B	ASP	57	OD2
																														/A	LYS	83	NZ	/B	ASP	57	CB
																														/A	LYS	83	NZ	/B	ASP	57	CG
[truncated: 9 more columns]
