# Supplementary figures and images for: Occurrences of allergenicity to banana pathogenesis-related-10 (PR10) protein variants
Source: Royal Society of Chemistry journal article supplement (doi:10.1039/d4fo03301a), 2024-01-01

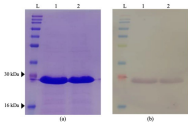

Supplement: d4fo03301a3.pdf [file d4fo03301a3.pdf]
